# Supplementary material for: Autoreactive T cells target peripheral nerves in Guillain–Barré syndrome
Source: PubMed Central journal article supplement (PMC10830418; doi:10.1038/s41586-023-06916-6), 2024-01-17
Supplement: 41586_2023_6916_MOESM1_ESM.pdf [file 41586_2023_6916_MOESM1_ESM.pdf]

---

**Supplementary information**

---

**Autoreactive T cells target peripheral nerves  
in Guillain–Barré syndrome**

---

In the format provided by the  
authors and unedited

**Supplementary Table 1**

**Comparative analyses of relevant gene expression displayed in Figure 2.** Detailed *P* values of comparative gene expression analyses displayed in Figure 2a, b, and d.

| Gene    | Aantigen reactive vs Non reactive | PNS-myelin reactive vs Flu Reactive | Significance |
|---------|-----------------------------------|-------------------------------------|--------------|
| FOXM1   | $P \leq 2e-16$                    |                                     | yes          |
| PLK1    | $P \leq 2e-16$                    |                                     | yes          |
| BUB1    | $P \leq 2e-16$                    |                                     | yes          |
| CCNB1   | $P \leq 2e-16$                    |                                     | yes          |
| TOP2A   | $P \leq 2e-16$                    |                                     | yes          |
| MKI67   | $P \leq 2e-16$                    |                                     | yes          |
| NME1    | $P \leq 2e-16$                    |                                     | yes          |
| ITGAE   | $P \leq 2e-16$                    |                                     | yes          |
| ITGA1   | $P = 3.2e-10$                     |                                     | yes          |
| TNFRSF4 | $P \leq 2e-16$                    |                                     | yes          |
| TNF     | $P \leq 2e-16$                    |                                     | yes          |
| HLA-DRA | $P \leq 2e-16$                    |                                     | yes          |
| ICOS    | $P \leq 2e-16$                    |                                     | yes          |
| IL2RA   | $P \leq 2e-16$                    |                                     | yes          |
| KIR2DL3 |                                   | $P = 0.45$                          | no           |
| KIR2DL1 |                                   | $P = 0.45$                          | no           |
| FCGR3A  |                                   | $P = 0.29$                          | no           |
| FGFBP2  |                                   | $P = 4e-11$                         | yes          |
| KLRF1   |                                   | $P = 0.48$                          | no           |
| CX3CR1  |                                   | $P = 3.9e-5$                        | yes          |
| ADGRG1  |                                   | $P = 0.039$                         | yes          |
| ZEB2    |                                   | $P = 0.00015$                       | yes          |
| ZNF683  |                                   | $P = 0.17$                          | no           |
| EOMES   |                                   | $P \leq 2e-16$                      | yes          |
| GNLY    |                                   | $P = 0.64$                          | no           |
| IFIT3   |                                   | $P = 0.0013$                        | yes          |
| HOPX    |                                   | $P = 0.00019$                       | yes          |
| KLRG1   |                                   | $P = 0.009$                         | yes          |
| KLRD1   |                                   | $P = 0.002$                         | yes          |
| NKG7    |                                   | $P = 2.8e-12$                       | yes          |
| GZMK    |                                   | $P = 0.65$                          | no           |
| GZMB    |                                   | $P = 0.24$                          | no           |
| GZMA    |                                   | $P = 0.0016$                        | yes          |
| PFN1    |                                   | $P = 0.43$                          | no           |
| IL10    |                                   | $P = 0.54$                          | no           |
| IL9     |                                   | $P = 0.5$                           | no           |
| SPI1    |                                   | $P = 0.33$                          | no           |
| IL1RL1  |                                   | $P = 0.41$                          | no           |
| IL13    |                                   | $P = 0.56$                          | no           |
| IL5     |                                   | $P = 0.5$                           | no           |
| IL4     |                                   | $P = 0.36$                          | no           |
| PLAC8   |                                   | $P = 0.035$                         | yes          |
| IGFBP7  |                                   | $P = 0.24$                          | no           |
| CCR4    |                                   | $P = 0.017$                         | yes          |
| ILF2    |                                   | $P = 0.26$                          | no           |
| GATA3   |                                   | $P = 0.1$                           | no           |
| TGFB1   |                                   | $P = 0.48$                          | no           |
| RORC    |                                   | $P = 0.33$                          | no           |
| IL1B    |                                   | N.A.                                | N.A.         |
| IL17A   |                                   | N.A.                                | N.A.         |
| IL22    |                                   | $P = 0.51$                          | no           |
| IL23A   |                                   | $P = 0.093$                         | no           |
| IL6ST   |                                   | $P = 0.002$                         | yes          |
| NETO2   |                                   | $P = 0.0014$                        | yes          |
| IFNG    |                                   | $P = 3.2e-8$                        | yes          |
| XCL1    |                                   | $P = 0.19$                          | no           |
| LTA     |                                   | $P = 0.096$                         | no           |
| IRF7    |                                   | $P = 0.00054$                       | yes          |
| STAT3   |                                   | $P = 0.031$                         | yes          |
| STAT1   |                                   | $P \leq 2e-16$                      | yes          |
| CCL4    |                                   | $P \leq 2e-16$                      | yes          |
| CCL3    |                                   | $P = 0.00021$                       | yes          |
| CCL5    |                                   | $P \leq 2e-16$                      | yes          |
| CXCR3   |                                   | $P = 3.7e-14$                       | yes          |
| TBX21   |                                   | $P = 0.74$                          | no           |

N.A. = not available

significantly upregulated in PNS-myelin reactive vs. Flu reactive

## **Supplementary Table 2**

**PNS-myelin reactive T cell clones isolated from GBS patients.** Detailed information of clonotype, CDR3 $\beta$  length, HLA restriction, epitope targeted, TCR $\beta$  publicity and GLIPH2 cluster contribution of all single T cell clones (n = 987, CD4<sup>+</sup> T cells; n = 55, CD8<sup>+</sup> T cells) obtained from the GBS patients included in the study.

| PT      | Clone number | Clone ID | Clonotype ID | Source | Specificity | CD3 $\beta$ (aa)  | TRBV     | CD3 $\beta$ length (nt) | in CSF  | No Ag (cpm) | PNS-myein antigen (cpm) | Epitope (aa) | Restriction | Public Clonotype | GLIPH CLUSTER (ID) |
|---------|--------------|----------|--------------|--------|-------------|-------------------|----------|-------------------------|---------|-------------|-------------------------|--------------|-------------|------------------|--------------------|
| PT1-AC  | 1            | D04AC    | CD4_1        | Blood  | P0          | CASSPTFYVNTGELFF  | TRBV5-4  | 45                      |         | 171         | 2744                    | 131-145      | HLA-DR      | no               |                    |
| PT1-REC | 2            | C09REC   | CD4_2        | Blood  | P0          | CARRNGDTDTYF      | TRBV7-7  | 39                      |         | 109         | 1810                    | 191-205      | HLA-DR      | no               |                    |
| PT1-REC | 3            | H04REC   | CD4_3        | Blood  | P0          | CASSLARLFTGELFF   | TRBV5-1  | 39                      |         | 199         | 5098                    | 191-205      | HLA-DR      | no               |                    |
| PT1-REC | 4            | C12REC   | CD4_4        | Blood  | P0          | CASSLGGAGEQYF     | TRBV7-8  | 33                      |         | 357         | 1996                    | N.D.         | N.D.        | no               |                    |
| PT1-REC | 5            | D09REC   | CD4_5        | Blood  | P0          | CASSLGMGRNQPQHF   | TRBV5-8  | 39                      |         | 143         | 1596                    | 191-205      | HLA-DR      | no               |                    |
| PT1-REC | 6            | A09REC   | CD4_5        | Blood  | P0          | CASSLGMGRNQPQHF   | TRBV5-8  | 39                      |         | 161         | 1529                    | 191-205      | HLA-DR      | no               |                    |
| PT1-REC | 7            | A07REC   | CD4_5        | Blood  | P0          | CASSLGMGRNQPQHF   | TRBV5-8  | 39                      |         | 270         | 1748                    | 191-205      | HLA-DR      | no               |                    |
| PT1-REC | 8            | A09REC   | CD4_5        | Blood  | P0          | CASSLGMGRNQPQHF   | TRBV5-8  | 39                      |         | 129         | 5070                    | 191-205      | HLA-DR      | no               |                    |
| PT1-REC | 9            | A12REC   | CD4_5        | Blood  | P0          | CASSLGMGRNQPQHF   | TRBV5-8  | 39                      |         | 157         | 3778                    | 191-205      | HLA-DR      | no               |                    |
| PT1-REC | 10           | B01REC   | CD4_5        | Blood  | P0          | CASSLGMGRNQPQHF   | TRBV5-8  | 39                      |         | 218         | 1804                    | 191-205      | HLA-DR      | no               |                    |
| PT1-REC | 11           | C03REC   | CD4_5        | Blood  | P0          | CASSLGMGRNQPQHF   | TRBV5-8  | 39                      |         | 140         | 6446                    | 191-205      | HLA-DR      | no               |                    |
| PT1-REC | 12           | C04REC   | CD4_5        | Blood  | P0          | CASSLGMGRNQPQHF   | TRBV5-8  | 39                      |         | 133         | 5871                    | 191-205      | HLA-DR      | no               |                    |
| PT1-REC | 13           | C07REC   | CD4_5        | Blood  | P0          | CASSLGMGRNQPQHF   | TRBV5-8  | 39                      |         | 81          | 1836                    | 191-205      | HLA-DR      | no               |                    |
| PT1-REC | 14           | C11REC   | CD4_5        | Blood  | P0          | CASSLGMGRNQPQHF   | TRBV5-8  | 39                      |         | 102         | 6486                    | 191-205      | HLA-DR      | no               |                    |
| PT1-REC | 15           | D02REC   | CD4_5        | Blood  | P0          | CASSLGMGRNQPQHF   | TRBV5-8  | 39                      |         | 166         | 1701                    | 191-205      | HLA-DR      | no               |                    |
| PT1-REC | 16           | D07REC   | CD4_5        | Blood  | P0          | CASSLGMGRNQPQHF   | TRBV5-8  | 39                      |         | 96          | 1927                    | 191-205      | HLA-DR      | no               |                    |
| PT1-REC | 17           | D08REC   | CD4_5        | Blood  | P0          | CASSLGMGRNQPQHF   | TRBV5-8  | 39                      |         | 180         | 4980                    | 191-205      | HLA-DR      | no               |                    |
| PT1-REC | 18           | D11REC   | CD4_5        | Blood  | P0          | CASSLGMGRNQPQHF   | TRBV5-8  | 39                      |         | 151         | 3473                    | 191-205      | HLA-DR      | no               |                    |
| PT1-REC | 19           | E02REC   | CD4_5        | Blood  | P0          | CASSLGMGRNQPQHF   | TRBV5-8  | 39                      |         | 275         | 3289                    | 191-205      | HLA-DR      | no               |                    |
| PT1-REC | 20           | E03REC   | CD4_5        | Blood  | P0          | CASSLGMGRNQPQHF   | TRBV5-8  | 39                      |         | 146         | 4246                    | 191-205      | HLA-DR      | no               |                    |
| PT1-REC | 21           | E09REC   | CD4_5        | Blood  | P0          | CASSLGMGRNQPQHF   | TRBV5-8  | 39                      |         | 110         | 4122                    | 191-205      | HLA-DR      | no               |                    |
| PT1-REC | 22           | E10REC   | CD4_5        | Blood  | P0          | CASSLGMGRNQPQHF   | TRBV5-8  | 39                      |         | 122         | 1198                    | 191-205      | HLA-DR      | no               |                    |
| PT1-REC | 23           | E12REC   | CD4_5        | Blood  | P0          | CASSLGMGRNQPQHF   | TRBV5-8  | 39                      |         | 134         | 3721                    | 191-205      | HLA-DR      | no               |                    |
| PT1-REC | 24           | F02REC   | CD4_5        | Blood  | P0          | CASSLGMGRNQPQHF   | TRBV5-8  | 39                      |         | 114         | 2038                    | 191-205      | HLA-DR      | no               |                    |
| PT1-REC | 25           | F09REC   | CD4_5        | Blood  | P0          | CASSLGMGRNQPQHF   | TRBV5-8  | 39                      |         | 152         | 4964                    | 191-205      | HLA-DR      | no               |                    |
| PT1-REC | 26           | G02REC   | CD4_5        | Blood  | P0          | CASSLGMGRNQPQHF   | TRBV5-8  | 39                      |         | 166         | 6967                    | 191-205      | HLA-DR      | no               |                    |
| PT1-REC | 27           | G04REC   | CD4_5        | Blood  | P0          | CASSLGMGRNQPQHF   | TRBV5-8  | 39                      |         | 184         | 6909                    | 191-205      | HLA-DR      | no               |                    |
| PT1-REC | 28           | G05REC   | CD4_5        | Blood  | P0          | CASSLGMGRNQPQHF   | TRBV5-8  | 39                      |         | 168         | 5739                    | 191-205      | HLA-DR      | no               |                    |
| PT1-REC | 29           | G12REC   | CD4_5        | Blood  | P0          | CASSLGMGRNQPQHF   | TRBV5-8  | 39                      |         | 99          | 5631                    | 191-205      | HLA-DR      | no               |                    |
| PT1-REC | 30           | H03REC   | CD4_6        | Blood  | P0          | CASSGQARDTYF      | TRBV11-2 | 33                      |         | 161         | 1651                    | N.D.         | HLA-DR      | no               |                    |
| PT1-REC | 31           | F01REC   | CD4_6        | Blood  | P0          | CASSGQARDTYF      | TRBV11-2 | 33                      |         | 223         | 1029                    | 26-40        | HLA-DR      | no               |                    |
| PT1-REC | 32           | F02REC   | CD4_6        | Blood  | P0          | CASSGQARDTYF      | TRBV11-2 | 33                      |         | 267         | 1029                    | 26-40        | HLA-DR      | no               |                    |
| PT1-REC | 33           | C02REC   | CD4_7        | Blood  | P0          | CASSSTAGTDTTYF    | TRBV7-7  | 39                      |         | 62          | 1155                    | 141-155      | HLA-DR      | no               |                    |
| PT1-REC | 34           | H07REC   | N.D.         | Blood  | P0          | N.D.              | N.D.     | N.D.                    |         | 76          | 5117                    | 141-155      | N.D.        | N.D.             |                    |
| PT1-AC  | 35           | D07AC    | N.D.         | Blood  | P0          | N.D.              | N.D.     | N.D.                    |         | 471         | 1085                    | N.D.         | N.D.        | N.D.             |                    |
| PT1-AC  | 36           | F06AC    | N.D.         | Blood  | P0          | N.D.              | N.D.     | N.D.                    |         | 359         | 1125                    | N.D.         | N.D.        | N.D.             |                    |
| PT1-AC  | 37           | G02AC    | N.D.         | Blood  | P0          | N.D.              | N.D.     | N.D.                    |         | 488         | 1373                    | N.D.         | N.D.        | N.D.             |                    |
| PT1-REC | 38           | G10REC   | N.D.         | Blood  | P0          | N.D.              | N.D.     | N.D.                    |         | 183         | 3535                    | 191-205      | HLA-DR      | N.D.             |                    |
| PT1-REC | 39           | E11REC   | N.D.         | Blood  | P0          | N.D.              | N.D.     | N.D.                    |         | 139         | 4871                    | N.D.         | HLA-DR      | N.D.             |                    |
| PT2-AC  | 40           | A04AC    | CD4_8        | Blood  | P0          | CASREGANSPLHF     | TRBV19   | 33                      |         | 2229        | 35270                   | 21-35        | N.D.        | N.D.             |                    |
| PT2-REC | 41           | F07REC3  | CD4_9        | Blood  | P0-CMV      | CASSERCGANTGELFF  | TRBV6-1  | 48                      |         | 178         | 1907                    | N.D.         | HLA-DP      | no               |                    |
| PT2-REC | 42           | A09REC3  | CD4_9        | Blood  | P0          | CASSERCGANTGELFF  | TRBV6-2  | 48                      |         | 135         | 1234                    | N.D.         | N.D.        | no               |                    |
| PT2-REC | 43           | B12REC3  | CD4_10       | Blood  | P0          | CASSPIAGGAFTEAFF  | TRBV27   | 51                      |         | 123         | 1461                    | N.D.         | N.D.        | no               |                    |
| PT2-REC | 44           | D03REC3  | CD4_11       | Blood  | P0          | CASSTGQNTTEAFF    | TRBV6-2  | 42                      |         | 127         | 1230                    | N.D.         | HLA-DR      | no               |                    |
| PT2-REC | 45           | E12REC3  | CD4_12       | Blood  | P0-CMV      | CAWSKGAFAFF       | TRBV30   | 36                      |         | 141         | 1488                    | N.D.         | N.D.        | no               |                    |
| PT2-REC | 46           | E02REC3  | CD4_13       | Blood  | P0-CMV      | CAWSMGEYFF        | TRBV30   | 33                      |         | 152         | 1743                    | N.D.         | HLA-DR      | no               | CLUSTER_9          |
| PT2-REC | 47           | A06REC3  | N.D.         | Blood  | P0-CMV      | N.D.              | N.D.     | N.D.                    |         | 196         | 1547                    | N.D.         | HLA-DR      | N.D.             |                    |
| PT2-REC | 48           | B05REC3  | N.D.         | Blood  | P0-CMV      | N.D.              | N.D.     | N.D.                    |         | 130         | 1739                    | N.D.         | HLA-DR      | N.D.             |                    |
| PT2-REC | 49           | E11REC3  | N.D.         | Blood  | P0-CMV      | N.D.              | N.D.     | N.D.                    |         | 102         | 1887                    | N.D.         | N.D.        | N.D.             |                    |
| PT2-REC | 50           | H06REC1  | CD4_14       | Blood  | P0-CMV      | CASSPAGTRNEQFF    | TRBV19   | 45                      |         | 118         | 1195                    | N.D.         | HLA-DR      | no               |                    |
| PT2-REC | 51           | C06REC1  | CD4_15       | Blood  | P0          | CASSQEEAGMDEQFF   | TRBV4-1  | 48                      |         | 146         | 1587                    | N.D.         | N.D.        | no               |                    |
| PT2-REC | 52           | G05REC1  | CD4_16       | Blood  | P0          | CASSVPTGDRDEQYF   | TRBV6-2  | 48                      |         | 159         | 1734                    | N.D.         | N.D.        | no               |                    |
| PT2-REC | 53           | C15REC1  | CD4_17       | Blood  | P0          | CASSVPTGDRDEQYF   | TRBV6-4  | 54                      |         | 205         | 2077                    | 61-85        | HLA-DR      | no               |                    |
| PT2-REC | 54           | H12REC1  | CD4_18       | Blood  | P0          | CASSVYRGEYTYF     | TRBV6-5  | 42                      |         | 153         | 1576                    | N.D.         | HLA-DR      | no               |                    |
| PT2-REC | 55           | D02REC1  | CD4_19       | Blood  | P0          | CATNKGQCLANTEAFF  | TRBV27   | 45                      |         | 457         | 1899                    | N.D.         | N.D.        | no               |                    |
| PT2-REC | 56           | C11REC1  | CD4_20       | Blood  | P0          | CAWGSGLLEFF       | TRBV30   | 33                      |         | 207         | 1947                    | N.D.         | N.D.        | no               |                    |
| PT2-REC | 57           | C08REC1  | CD4_21       | Blood  | P0-CMV      | CAWGSQGNQPQHF     | TRBV30   | 39                      |         | 147         | 2699                    | N.D.         | N.D.        | no               | CLUSTER_8          |
| PT2-REC | 58           | B09REC1  | N.D.         | Blood  | P0          | N.D.              | N.D.     | N.D.                    |         | 367         | 1655                    | N.D.         | N.D.        | N.D.             |                    |
| PT2-REC | 59           | D04REC1  | N.D.         | Blood  | P0-CMV      | N.D.              | N.D.     | N.D.                    |         | 868         | 2139                    | N.D.         | HLA-DR      | N.D.             |                    |
| PT2-REC | 60           | A03REC1  | N.D.         | Blood  | P0-CMV      | N.D.              | N.D.     | N.D.                    |         | 146         | 2331                    | N.D.         | HLA-DR      | N.D.             |                    |
| PT2-REC | 61           | D01REC1  | N.D.         | Blood  | P0-CMV      | N.D.              | N.D.     | N.D.                    |         | 798         | 3387                    | N.D.         | N.D.        | N.D.             |                    |
| PT2-REC | 62           | G09REC1  | N.D.         | Blood  | P0-CMV      | N.D.              | N.D.     | N.D.                    |         | 298         | 1387                    | N.D.         | HLA-DR      | N.D.             |                    |
| PT3-REC | 63           | B08REC   | CD4_22       | Blood  | P0          | CASSPARGGGYF      | TRBV18   | 36                      |         | 406         | 9057                    | 186-200      | N.D.        | no               |                    |
| PT3-REC | 64           | D08REC   | CD4_22       | Blood  | P0          | CASSPARGGGYF      | TRBV18   | 36                      |         | 292         | 5100                    | 186-200      | HLA-DR      | no               |                    |
| PT3-REC | 65           | C08REC   | CD4_22       | Blood  | P0          | CASSPARGGGYF      | TRBV18   | 36                      |         | 256         | 6697                    | N.D.         | N.D.        | no               |                    |
| PT3-REC | 66           | C10REC   | CD4_22       | Blood  | P0          | CASSPARGGGYF      | TRBV18   | 36                      |         | 290         | 5431                    | N.D.         | N.D.        | no               |                    |
| PT3-REC | 67           | G08REC   | CD4_22       | Blood  | P0          | CASSPARGGGYF      | TRBV18   | 36                      |         | 302         | 2149                    | N.D.         | N.D.        | no               |                    |
| PT4-REC | 68           | C01REC   | CD4_23       | Blood  | P0          | CASSVPTNKLKLF     | TRBV9    | 42                      |         | 139         | 5506                    | N.D.         | N.D.        | no               |                    |
| PT4-REC | 69           | B09REC   | N.D.         | Blood  | P0          | N.D.              | N.D.     | N.D.                    |         | 271         | 1846                    | 186-180      | HLA-DR      | N.D.             |                    |
| PT7-REC | 70           | CL39REC  | CD4_24       | Blood  | P0          | CASNRRGQDEYDF     | TRBV7-8  | 36                      | in PT11 | 2471        | 6185                    | N.D.         | N.D.        | no               |                    |
| PT7-REC | 71           | CL37REC  | CD4_25       | Blood  | P0          | CASSYPLQETQYF     | TRBV7-2  | 39                      |         | 1422        | 8484                    | 46-60        | N.D.        | no               |                    |
| PT7-REC | 72           | CL09REC  | CD4_26       | Blood  | P0          | CASSGPARQYTYF     | TRBV19   | 36                      |         | 166         | 2403                    | N.D.         | N.D.        | no               |                    |
| PT7-REC | 73           | CL12REC  | CD4_27       | Blood  | P0          | CASSLARGEQYF      | TRBV5-1  | 30                      |         | 1160        | 19899                   | 21-35        | HLA-DR      | no               |                    |
| PT7-REC | 74           | CL06REC  | CD4_28       | Blood  | P0          | CASSLRDGSVRSSTQYF | TRBV7-2  | 48                      | in PT11 | 436         | 7440                    | 46-65        | HLA-DP      | yes              |                    |
| PT7-REC | 75           | CL01REC  | CD4_28       | Blood  | P0          | CASSLRDGSVRSSTQYF | TRBV7-2  | 48                      | in PT11 | 176         | 3239                    | N.D.         | N.D.        | no               |                    |
| PT7-REC | 76           | CL15REC  | CD4_28       | Blood  | P0          | CASSLRDGSVRSSTQYF | TRBV7-2  | 48                      | in PT11 | 823         | 3980                    | N.D.         | HLA-DP      | no               |                    |
| PT7-REC | 77           | CL18REC  | CD4_28       | Blood  | P0          | CASSLRDGSVRSSTQYF | TRBV7-2  | 48                      | in PT11 | 372         | 5924                    | N.D.         | HLA-DP      | no               |                    |
| PT7-REC | 78           | CL20REC  | CD4_28       | Blood  | P0          | CASSLRDGSVRSSTQYF | TRBV7-2  | 48                      | in PT11 | 158         | 8485                    | N.D.         | HLA-DP      | no               |                    |
| PT7-REC | 79           | CL24REC  | CD4_28       | Blood  | P0          | CASSLRDGSVRSSTQYF | TRBV7-2  | 48                      | in PT11 | 635         | 2677                    | N.D.         | HLA-DP      | no               |                    |
| PT7-REC | 80           | CL32REC  | CD4_28       | Blood  | P0          | CASSLRDGSVRSSTQYF | TRBV7-2  | 48                      | in PT11 | 127         | 4419                    | N.D.         | HLA-DP      | no               |                    |
| PT7-REC | 81           | CL34REC  | CD4_28       | Blood  | P0          | CASSLRDGSVRSSTQYF | TRBV7-2  | 48                      | in PT11 | 370         | 1974                    | N.D.         | HLA-DP      | no               |                    |
| PT7-REC | 82           | CL37REC  | CD4_28       | Blood  | P0          | CASSLRDGSVRSSTQYF | TRBV7-2  | 48                      | in PT11 | 192         | 3752                    | N.D.         | HLA-DP      | no               |                    |
| PT7-REC | 83           | CL52REC  | CD4_28       | Blood  | P0          | CASSLRDGSVRSSTQYF | TRBV7-2  | 48                      | in PT11 | 1741        | 5289                    | N.D.         | HLA-DP      | no               |                    |
| PT7-REC | 84           | CL06REC  | CD4_28       | Blood  | P0          | CASSLRDGSVRSSTQYF | TRBV7-2  | 48                      | in PT11 | 333         | 4856                    | N.D.         | HLA-DP      | no               |                    |
| PT7-REC | 85           | CL19REC  | CD4_28       | Blood  | P0          | CASSLRDGSVRSSTQYF | TRBV7-2  | 48                      | in PT11 | 3957        | 10043                   | N.D.         | HLA-DP      | no               |                    |
| PT7-REC | 86           | CL45REC  | CD4_28       | Blood  | P0          | CASSLRDGSVRSSTQYF | TRBV7-2  | 48                      | in PT11 | 156         | 1707                    | N.D.         | N.D.        | no               |                    |
| PT7-REC | 87           | CL37REC  | CD4_28       | Blood  | P0          | CASSLRDGSVRSSTQYF | TRBV7-2  | 48                      | in PT11 | 891         | 3775                    | N.D.         | HLA-DP      | no               |                    |
| PT7-REC | 88           | CL39REC  | CD4_28       | Blood  | P0          | CASSLRDGSVRSSTQYF | TRBV7-2  | 48                      | in PT11 | 630         | 2386                    | N.D.         | HLA-DP      | no               |                    |
| PT7-REC | 89           | CL07REC  | CD4_28       | Blood  | P0          | CASSLRDGSVRSSTQYF | TRBV7-2  | 48                      | in PT11 | 377         | 3386                    | N.D.         | HLA-DP      | no               |                    |
| PT7-REC | 90           | CL70REC  | CD4_28       | Blood  | P0          | CASSLRDGSVRSSTQYF | TRBV7-2  | 48                      | in PT11 | 864         | 3453                    | N.D.         | HLA-DP      | no               |                    |
| PT7-REC | 91           | CL73REC  | CD4_28       | Blood  | P0          | CASSLRDGSVRSSTQYF | TRBV7-2  | 48                      | in PT11 | 122         | 4854                    | N.D.         | HLA-DP      | no               |                    |
| PT7-REC | 92           | CL83REC  | CD4_28       | Blood  | P0          | CASSLRDGSVRSSTQYF | TRBV7-2  | 48                      | in PT11 | 651         | 4257                    | N.D.         | HLA-DP      | no               |                    |
| PT7-REC | 93           | CL85REC  | CD4_28       | Blood  | P0          | CASSLRDGSVRSSTQYF | TRBV7-2  | 48                      | in PT11 | 162         | 5917                    | N.D.         | HLA-DP      | no               |                    |
| PT7-REC | 94           | CL93REC  | CD4_28       | Blood  | P0          | CASSLRDGSVRSSTQYF | TRBV7-2  | 48                      | in PT11 | 2875        | 7103                    | N.D.         | HLA-DP      | no               |                    |
| PT7-REC | 95           | CL96REC  | CD4_28       | Blood  | P0          | CASSLRDGSVRSSTQYF | TRBV7-2  | 48                      | in PT11 | 869         | 7747                    | N.D.         | HLA-DP      | no               |                    |
| PT7-REC | 96           | CL97REC  | CD4_28       | Blood  | P0          | CASSLRDGSVRSSTQYF | TRBV7-2  | 48                      | in PT11 | 247         | 5027                    |              |             |                  |                    |

|          |     |        |        |       |    |                |         |      |         |       |                   |         |      |     |           |
|----------|-----|--------|--------|-------|----|----------------|---------|------|---------|-------|-------------------|---------|------|-----|-----------|
| PT8-AC   | 129 | C06AC  | CD4_39 | Blood | P0 | CASNQPGGSEYQYF | TRBV7-8 | 39   | 1766    | 5335  | N.D.              | N.D.    | no   |     |           |
| PT8-AC   | 130 | D01AC  | CD4_39 | Blood | P0 | CASNQPGGSEYQYF | TRBV7-8 | 39   | 987     | 8504  | N.D.              | N.D.    | no   |     |           |
| PT8-AC   | 131 | D02AC  | CD4_39 | Blood | P0 | CASNQPGGSEYQYF | TRBV7-8 | 39   | 635     | 10301 | N.D.              | N.D.    | no   |     |           |
| PT8-AC   | 132 | D05AC  | CD4_39 | Blood | P0 | CASNQPGGSEYQYF | TRBV7-8 | 39   | 981     | 4934  | N.D.              | N.D.    | no   |     |           |
| PT8-AC   | 133 | D08AC  | CD4_39 | Blood | P0 | CASNQPGGSEYQYF | TRBV7-8 | 39   | 1395    | 5196  | N.D.              | N.D.    | no   |     |           |
| PT8-AC   | 134 | E02AC  | CD4_39 | Blood | P0 | CASNQPGGSEYQYF | TRBV7-8 | 39   | 1983    | 10321 | N.D.              | N.D.    | no   |     |           |
| PT8-AC   | 135 | F02AC  | CD4_39 | Blood | P0 | CASNQPGGSEYQYF | TRBV7-8 | 39   | 1248    | 7071  | N.D.              | N.D.    | no   |     |           |
| PT8-AC   | 136 | G09AC  | CD4_39 | Blood | P0 | CASNQPGGSEYQYF | TRBV7-8 | 39   | 1356    | 7321  | N.D.              | N.D.    | no   |     |           |
| PT8-AC   | 137 | H03AC  | CD4_39 | Blood | P0 | CASNQPGGSEYQYF | TRBV7-8 | 39   | 938     | 4960  | N.D.              | N.D.    | no   |     |           |
| PT8-AC   | 138 | H04AC  | CD4_39 | Blood | P0 | CASNQPGGSEYQYF | TRBV7-8 | 39   | 932     | 8637  | N.D.              | N.D.    | no   |     |           |
| PT8-AC   | 139 | F09AC  | CD4_39 | Blood | P0 | CASNQPGGSEYQYF | TRBV7-8 | 39   | 785     | 6535  | N.D.              | N.D.    | no   |     |           |
| PT8-AC   | 140 | B03AC  | CD4_39 | Blood | P0 | CASNQPGGSEYQYF | TRBV7-8 | 39   | 620     | 5165  | 36.50             | N.D.    | no   |     |           |
| PT8-AC   | 141 | F11AC  | CD4_39 | Blood | P0 | CASNQPGGSEYQYF | TRBV7-8 | 39   | 826     | 5433  | 36.50             | N.D.    | no   |     |           |
| PT8-AC   | 142 | G01AC  | CD4_39 | Blood | P0 | CASNQPGGSEYQYF | TRBV7-8 | 39   | 492     | 6963  | 36.50             | N.D.    | no   |     |           |
| PT8-REC  | 143 | D08REC | CD4_39 | Blood | P0 | CASNQPGGSEYQYF | TRBV7-8 | 39   | 1297    | 8617  | N.D.              | HLA-DQ  | no   |     |           |
| PT8-REC  | 144 | C01REC | CD4_39 | Blood | P0 | CASNQPGGSEYQYF | TRBV7-8 | 39   | 1497    | 7714  | N.D.              | HLA-DQ  | no   |     |           |
| PT8-REC  | 145 | C04REC | CD4_39 | Blood | P0 | CASNQPGGSEYQYF | TRBV7-8 | 39   | 2486    | 8798  | N.D.              | N.D.    | no   |     |           |
| PT8-REC  | 146 | D05REC | CD4_39 | Blood | P0 | CASNQPGGSEYQYF | TRBV7-8 | 39   | 2359    | 9770  | N.D.              | N.D.    | no   |     |           |
| PT8-REC  | 147 | B02REC | CD4_40 | Blood | P0 | CASNQPGGSEYQYF | TRBV7-8 | 39   | 1715    | 6319  | N.D.              | HLA-DQ  | no   |     |           |
| PT8-REC  | 148 | B06REC | CD4_40 | Blood | P0 | CASNQPGGSEYQYF | TRBV7-8 | 39   | 510     | 2708  | N.D.              | N.D.    | no   |     |           |
| PT8-AC   | 149 | C10AC  | N.D.   | Blood | P0 | N.D.           | N.D.    | N.D. | 224     | 4963  | N.D.              | N.D.    | N.D. |     |           |
| PT8-AC   | 150 | H09REC | N.D.   | Blood | P0 | N.D.           | N.D.    | N.D. | 1338    | 5481  | N.D.              | N.D.    | N.D. |     |           |
| PT8-AC   | 151 | G08AC  | N.D.   | Blood | P0 | N.D.           | N.D.    | N.D. | 474     | 6694  | N.D.              | N.D.    | N.D. |     |           |
| PT8-AC   | 152 | E09AC  | N.D.   | Blood | P0 | N.D.           | N.D.    | N.D. | 922     | 7249  | N.D.              | N.D.    | N.D. |     |           |
| PT8-AC   | 153 | E10AC  | N.D.   | Blood | P0 | N.D.           | N.D.    | N.D. | 306     | 1700  | N.D.              | N.D.    | N.D. |     |           |
| PT8-AC   | 154 | E04AC  | N.D.   | Blood | P0 | N.D.           | N.D.    | N.D. | 1482    | 6224  | N.D.              | N.D.    | N.D. |     |           |
| PT8-AC   | 155 | B02AC  | N.D.   | Blood | P0 | N.D.           | N.D.    | N.D. | 1521    | 4188  | N.D.              | N.D.    | N.D. |     |           |
| PT8-AC   | 156 | A11AC  | N.D.   | Blood | P0 | N.D.           | N.D.    | N.D. | 85      | 2925  | N.D.              | N.D.    | N.D. |     |           |
| PT8-AC   | 157 | A08AC  | N.D.   | Blood | P0 | N.D.           | N.D.    | N.D. | 293     | 1637  | N.D.              | N.D.    | N.D. |     |           |
| PT8-AC   | 158 | A06AC  | N.D.   | Blood | P0 | N.D.           | N.D.    | N.D. | 1902    | 7643  | N.D.              | N.D.    | N.D. |     |           |
| PT8-REC  | 159 | D02REC | N.D.   | Blood | P0 | N.D.           | N.D.    | N.D. | 689     | 4959  | N.D.              | N.D.    | N.D. |     |           |
| PT8-REC  | 160 | A06REC | N.D.   | Blood | P0 | N.D.           | N.D.    | N.D. | 636     | 5348  | N.D.              | N.D.    | N.D. |     |           |
| PT8-REC  | 161 | H06REC | N.D.   | Blood | P0 | N.D.           | N.D.    | N.D. | 1747    | 6302  | N.D.              | N.D.    | N.D. |     |           |
| PT8-REC  | 162 | A05REC | N.D.   | Blood | P0 | N.D.           | N.D.    | N.D. | 190     | 2212  | N.D.              | N.D.    | N.D. |     |           |
| PT8-REC  | 163 | A10REC | N.D.   | Blood | P0 | N.D.           | N.D.    | N.D. | 1171    | 8175  | N.D.              | N.D.    | N.D. |     |           |
| PT8-REC  | 164 | B03REC | N.D.   | Blood | P0 | N.D.           | N.D.    | N.D. | 952     | 2501  | N.D.              | N.D.    | N.D. |     |           |
| PT8-REC  | 165 | C03REC | N.D.   | Blood | P0 | N.D.           | N.D.    | N.D. | 271     | 1213  | N.D.              | N.D.    | N.D. |     |           |
| PT8-REC  | 166 | C10REC | N.D.   | Blood | P0 | N.D.           | N.D.    | N.D. | 83      | 1850  | N.D.              | N.D.    | N.D. |     |           |
| PT8-REC  | 167 | D04REC | N.D.   | Blood | P0 | N.D.           | N.D.    | N.D. | 258     | 1287  | N.D.              | N.D.    | N.D. |     |           |
| PT8-REC  | 168 | E09REC | N.D.   | Blood | P0 | N.D.           | N.D.    | N.D. | 524     | 3965  | N.D.              | N.D.    | N.D. |     |           |
| PT8-REC  | 169 | C05REC | N.D.   | Blood | P0 | N.D.           | N.D.    | N.D. | 1404    | 6188  | N.D.              | N.D.    | N.D. |     |           |
| PT10-AC  | 170 | F11AC  | CD4_41 | Blood | P0 | CAHPVPGGTAFF   | TRBV6-2 | 33   | 135     | 3843  | 191-205           | HLA-DR  | no   |     |           |
| PT10-AC  | 171 | E12AC  | CD4_42 | Blood | P0 | CANQTGGYEQYF   | TRBV6-5 | 30   | in PT11 | 94    | 13000             | 131-150 | N.D. | yes | CLUSTER_7 |
| PT10-AC  | 172 | B08AC  | CD4_42 | Blood | P0 | CANQTGGYEQYF   | TRBV6-5 | 30   | in PT11 | 81    | 3344              | N.D.    | N.D. | yes | CLUSTER_7 |
| PT10-AC  | 173 | C03AC  | CD4_42 | Blood | P0 | CANQTGGYEQYF   | TRBV6-5 | 30   | in PT11 | 81    | 2826              | N.D.    | N.D. | yes | CLUSTER_7 |
| PT10-AC  | 174 | C10AC  | CD4_42 | Blood | P0 | CANQTGGYEQYF   | TRBV6-5 | 30   | in PT11 | 120   | 2342              | N.D.    | N.D. | yes | CLUSTER_7 |
| PT10-AC  | 175 | E10AC  | CD4_42 | Blood | P0 | CANQTGGYEQYF   | TRBV6-5 | 30   | in PT11 | 99    | 2053              | N.D.    | N.D. | yes | CLUSTER_7 |
| PT10-AC  | 176 | E11AC  | CD4_42 | Blood | P0 | CANQTGGYEQYF   | TRBV6-5 | 30   | in PT11 | 111   | 3788              | N.D.    | N.D. | yes | CLUSTER_7 |
| PT10-AC  | 177 | F02AC  | CD4_42 | Blood | P0 | CANQTGGYEQYF   | TRBV6-5 | 30   | in PT11 | 95    | 7298              | N.D.    | N.D. | yes | CLUSTER_7 |
| PT10-AC  | 178 | F10AC  | CD4_42 | Blood | P0 | CANQTGGYEQYF   | TRBV6-5 | 30   | in PT11 | 126   | 15044             | N.D.    | N.D. | yes | CLUSTER_7 |
| PT10-AC  | 179 | G03AC  | CD4_42 | Blood | P0 | CANQTGGYEQYF   | TRBV6-5 | 30   | in PT11 | 132   | 7033              | N.D.    | N.D. | yes | CLUSTER_7 |
| PT10-AC  | 180 | H03AC  | CD4_42 | Blood | P0 | CANQTGGYEQYF   | TRBV6-5 | 30   | in PT11 | 97    | 6915              | N.D.    | N.D. | yes | CLUSTER_7 |
| PT10-AC  | 181 | H06AC  | CD4_42 | Blood | P0 | CANQTGGYEQYF   | TRBV6-5 | 30   | in PT11 | 142   | 2624              | N.D.    | N.D. | yes | CLUSTER_7 |
| PT10-AC  | 182 | F07AC  | CD4_43 | Blood | P0 | CASTEYTYSGNTYF | TRBV19  | 42   | 162     | 2756  | 146-160           | HLA-DR  | no   |     |           |
| PT10-AC  | 183 | H01AC  | CD4_43 | Blood | P0 | CASTEYTYSGNTYF | TRBV19  | 42   | 115     | 2308  | 146-160           | N.D.    | no   |     |           |
| PT10-AC  | 184 | A07AC  | N.D.   | Blood | P0 | N.D.           | N.D.    | N.D. | 155     | 5966  | N.D.              | N.D.    | N.D. |     |           |
| PT10-AC  | 185 | B05AC  | N.D.   | Blood | P0 | N.D.           | N.D.    | N.D. | 103     | 3312  | N.D.              | N.D.    | N.D. |     |           |
| PT10-AC  | 186 | B10AC  | N.D.   | Blood | P0 | N.D.           | N.D.    | N.D. | 99      | 2550  | N.D.              | N.D.    | N.D. |     |           |
| PT10-AC  | 187 | B11AC  | N.D.   | Blood | P0 | N.D.           | N.D.    | N.D. | 230     | 1782  | N.D.              | N.D.    | N.D. |     |           |
| PT10-AC  | 188 | C02AC  | N.D.   | Blood | P0 | N.D.           | N.D.    | N.D. | 233     | 2195  | N.D.              | N.D.    | N.D. |     |           |
| PT10-AC  | 189 | C05AC  | N.D.   | Blood | P0 | N.D.           | N.D.    | N.D. | 172     | 2091  | N.D.              | N.D.    | N.D. |     |           |
| PT10-AC  | 190 | C06AC  | N.D.   | Blood | P0 | N.D.           | N.D.    | N.D. | 106     | 1742  | N.D.              | N.D.    | N.D. |     |           |
| PT10-AC  | 191 | C07AC  | N.D.   | Blood | P0 | N.D.           | N.D.    | N.D. | 89      | 4552  | N.D.              | N.D.    | N.D. |     |           |
| PT10-AC  | 192 | C08AC  | N.D.   | Blood | P0 | N.D.           | N.D.    | N.D. | 138     | 3292  | N.D.              | N.D.    | N.D. |     |           |
| PT10-AC  | 193 | C12AC  | N.D.   | Blood | P0 | N.D.           | N.D.    | N.D. | 185     | 2388  | N.D.              | N.D.    | N.D. |     |           |
| PT10-AC  | 194 | D01AC  | N.D.   | Blood | P0 | N.D.           | N.D.    | N.D. | 136     | 3378  | N.D.              | N.D.    | N.D. |     |           |
| PT10-AC  | 195 | D03AC  | N.D.   | Blood | P0 | N.D.           | N.D.    | N.D. | 145     | 4357  | N.D.              | N.D.    | N.D. |     |           |
| PT10-AC  | 196 | D08AC  | N.D.   | Blood | P0 | N.D.           | N.D.    | N.D. | 75      | 5584  | N.D.              | N.D.    | N.D. |     |           |
| PT10-AC  | 197 | D08AC  | N.D.   | Blood | P0 | N.D.           | N.D.    | N.D. | 84      | 5906  | N.D.              | N.D.    | N.D. |     |           |
| PT10-AC  | 198 | D10AC  | N.D.   | Blood | P0 | N.D.           | N.D.    | N.D. | 121     | 1908  | N.D.              | N.D.    | N.D. |     |           |
| PT10-AC  | 199 | D11AC  | N.D.   | Blood | P0 | N.D.           | N.D.    | N.D. | 186     | 2488  | N.D.              | N.D.    | N.D. |     |           |
| PT10-AC  | 200 | E02AC  | N.D.   | Blood | P0 | N.D.           | N.D.    | N.D. | 109     | 8832  | N.D.              | N.D.    | N.D. |     |           |
| PT10-AC  | 201 | E04AC  | N.D.   | Blood | P0 | N.D.           | N.D.    | N.D. | 185     | 1953  | N.D.              | N.D.    | N.D. |     |           |
| PT10-AC  | 202 | E08AC  | N.D.   | Blood | P0 | N.D.           | N.D.    | N.D. | 108     | 2527  | N.D.              | N.D.    | N.D. |     |           |
| PT10-AC  | 203 | E07AC  | N.D.   | Blood | P0 | N.D.           | N.D.    | N.D. | 87      | 3827  | N.D.              | N.D.    | N.D. |     |           |
| PT10-AC  | 204 | E08AC  | N.D.   | Blood | P0 | N.D.           | N.D.    | N.D. | 112     | 5591  | N.D.              | N.D.    | N.D. |     |           |
| PT10-AC  | 205 | E09AC  | N.D.   | Blood | P0 | N.D.           | N.D.    | N.D. | 80      | 7430  | N.D.              | N.D.    | N.D. |     |           |
| PT10-AC  | 206 | F03AC  | N.D.   | Blood | P0 | N.D.           | N.D.    | N.D. | 158     | 1681  | N.D.              | N.D.    | N.D. |     |           |
| PT10-AC  | 207 | F08AC  | N.D.   | Blood | P0 | N.D.           | N.D.    | N.D. | 151     | 2274  | N.D.              | N.D.    | N.D. |     |           |
| PT10-AC  | 208 | G01AC  | N.D.   | Blood | P0 | N.D.           | N.D.    | N.D. | 210     | 6454  | N.D.              | N.D.    | N.D. |     |           |
| PT10-AC  | 209 | H09AC  | N.D.   | Blood | P0 | N.D.           | N.D.    | N.D. | 112     | 5528  | N.D.              | N.D.    | N.D. |     |           |
| PT12-AC  | 210 | A01AC  | CD4_44 | Blood | P0 | CASSDGLGGNTYF  | TRBV4-3 | 45   | 142     | 4881  | N.D.              | HLA-DQ  | no   |     |           |
| PT12-AC  | 211 | C11AC  | CD4_44 | Blood | P0 | CASSDGLGGNTYF  | TRBV4-3 | 45   | 118     | 1164  | N.D.              | HLA-DQ  | no   |     |           |
| PT12-AC  | 212 | D03AC  | CD4_44 | Blood | P0 | CASSDGLGGNTYF  | TRBV4-3 | 45   | 136     | 1287  | N.D.              | HLA-DQ  | no   |     |           |
| PT12-AC  | 213 | H08AC  | CD4_44 | Blood | P0 | CASSDGLGGNTYF  | TRBV4-3 | 45   | 102     | 1009  | N.D.              | HLA-DQ  | no   |     |           |
| PT12-AC  | 214 | H08AC  | CD4_44 | Blood | P0 | CASSDGLGGNTYF  | TRBV4-3 | 45   | 46      | 1243  | N.D.              | HLA-DQ  | no   |     |           |
| PT12-REC | 215 | C04REC | CD4_45 | Blood | P0 | CASTPGLYEQYF   | TRBV2   | 39   | 106     | 1014  | 191-205 / 231-244 | HLA-DR  | no   |     |           |
| PT12-REC | 216 | A08REC | CD4_45 | Blood | P0 | CASTPGLYEQYF   | TRBV2   | 39   | 237     | 1616  | 191-205 / 231-245 | HLA-DR  | no   |     |           |
| PT12-AC  | 217 | E03AC  | N.D.   | Blood | P0 | N.D.           | N.D.    | N.D. | 250     | 2113  | N.D.              | N.D.    | N.D. |     |           |
| PT12-AC  | 218 | A04AC  | N.D.   | Blood | P0 | N.D.           | N.D.    | N.D. | 86      | 4672  | N.D.              | N.D.    | N.D. |     |           |
| PT12-AC  | 219 | F05AC  | N.D.   | Blood | P0 | N.D.           | N.D.    | N.D. | 170     | 1102  | N.D.              | N.D.    | N.D. |     |           |
| PT12-AC  | 220 | G08AC  | N.D.   | Blood | P0 | N.D.           | N.D.    | N.D. | 124     | 3143  | N.D.              | N.D.    | N.D. |     |           |
| PT13-AC  | 221 | A01AC  | CD4_46 | Blood | P0 | CSARLDVSGYTF   | TRBV20  | 39   | 291     | 9058  | 191-205           | HLA-DR  | no   |     |           |
| PT13-AC  | 222 | B02AC  | N.D.   | Blood | P0 | N.D.           | N.D.    | N.D. | 256     | 6460  | 191-205           | HLA-DR  | N.D. |     |           |
| PT14-AC  | 223 | B05AC  | CD4_47 | Blood | P0 | CASSLAGVPNEKLF | TRBV7-6 | 48   | 566     | 4068  | N.D.              | N.D.    | no   |     |           |
| PT14-AC  | 224 | C05AC  | CD4_47 | Blood | P0 | CASSLAGVPNEKLF | TRBV7-6 | 48   | 739     | 3950  | N.D.              | N.D.    | no   |     |           |
| PT14-AC  | 225 | F04AC  | CD4_47 | Blood | P0 | CASSLAGVPNEKLF | TRBV7-6 | 48   | 1799    | 7056  | N.D.              | N.D.    | no   |     |           |
| PT14-AC  | 226 | G06AC  | CD4_47 | Blood | P0 | CASSLAGVPNEKLF | TRBV7-6 | 48   | 954     | 4608  | N.D.              | N.D.    | no   |     |           |
| PT14-AC  | 227 | H04AC  | CD4_47 | Blood | P0 | CASSLAGVPNEKLF | TRBV7-6 | 48   | 778     | 2867  | N.D.              | N.D.    | no   |     |           |
| PT14-AC  | 228 | H06AC  | CD4_47 | Blood | P0 | CASSLAGVPNEKLF | TRBV7-6 | 48   | 1481    | 4816  | N.D.              | N.D.    | no   |     |           |
| PT14-AC  | 229 | B01AC  | CD4_48 | Blood | P0 | CASSPTGLWETQYF | TRBV6-1 | 42   | 129     | 4367  | 21-35             | HLA-DR  | no   |     |           |
| PT14-AC  | 230 | B11AC  | CD4_48 | Blood | P0 | CASSPTGLWETQYF | TRBV6-1 | 42   | 106     | 1446  | N.D.              | N.D.    | no   |     |           |
| PT14-AC  | 231 | D12AC  | CD4_48 | Blood | P0 | CASSPTGLWETQYF | TRBV6-1 | 42   | 116     | 1077  | N.D.              | N.D.    | no   |     |           |
| PT14-AC  | 232 | E10AC  | CD4_48 | Blood | P0 | CASSPTGLWETQYF | TRBV6-1 | 42   | 118     | 1893  | N.D.              | N.D.    | no   |     |           |
| PT14-AC  | 233 | G03AC  | CD4_48 | Blood | P0 | CASSPTGLWETQYF | TRBV6-1 | 42   | 92      | 1053  | N.D.              | N.D.    | no   |     |           |
| PT14-AC  | 234 | E02AC  | CD4_48 | Blood | P0 | CASSPTGLWETQYF | TRBV6-1 | 42   | 163     | 5148  | N.D.              | N.D.    | no   |     |           |
| PT14-AC  | 235 |        |        |       |    |                |         |      |         |       |                   |         |      |     |           |

|          |     |        |        |       |    |                 |          |      |     |       |         |        |      |  |
|----------|-----|--------|--------|-------|----|-----------------|----------|------|-----|-------|---------|--------|------|--|
| PT14-AC  | 259 | H03AC  | CD4_50 | Blood | P0 | CSATPAGNTGELFF  | TRBV20   | 45   | 284 | 4621  | N.D.    | N.D.   | no   |  |
| PT14-AC  | 260 | H08AC  | CD4_50 | Blood | P0 | CSATPAGNTGELFF  | TRBV20   | 45   | 436 | 9232  | N.D.    | N.D.   | no   |  |
| PT14-AC  | 261 | C04AC  | CD4_50 | Blood | P0 | CSATPAGNTGELFF  | TRBV20   | 45   | 603 | 8885  | N.D.    | N.D.   | no   |  |
| PT14-AC  | 262 | F03AC  | CD4_50 | Blood | P0 | CSATPAGNTGELFF  | TRBV20   | 45   | 157 | 4695  | N.D.    | N.D.   | no   |  |
| PT14-AC  | 263 | F08AC  | CD4_50 | Blood | P0 | CSATPAGNTGELFF  | TRBV20   | 45   | 205 | 14490 | N.D.    | N.D.   | no   |  |
| PT14-AC  | 264 | H07AC  | CD4_50 | Blood | P0 | CSATPAGNTGELFF  | TRBV20   | 45   | 190 | 2845  | N.D.    | N.D.   | no   |  |
| PT14-AC  | 265 | E08AC  | CD4_50 | Blood | P0 | CSATPAGNTGELFF  | TRBV20   | 45   | 196 | 3610  | N.D.    | N.D.   | no   |  |
| PT14-AC  | 266 | E07AC  | CD4_51 | Blood | P0 | CASSQGSRAQETQYF | TRBV19   | 48   | 123 | 6786  | N.D.    | N.D.   | no   |  |
| PT14-REC | 267 | D01REC | CD4_51 | Blood | P0 | CASSQGSRAQETQYF | TRBV19   | 48   | 454 | 5593  | 76-80   | HLA-DR | no   |  |
| PT14-REC | 268 | D05REC | CD4_51 | Blood | P0 | CASSQGSRAQETQYF | TRBV19   | 48   | 501 | 3315  | N.D.    | N.D.   | no   |  |
| PT14-REC | 269 | A01REC | CD4_51 | Blood | P0 | CASSQGSRAQETQYF | TRBV19   | 48   | 464 | 12705 | N.D.    | N.D.   | no   |  |
| PT14-REC | 270 | A02REC | CD4_51 | Blood | P0 | CASSQGSRAQETQYF | TRBV19   | 48   | 364 | 11680 | N.D.    | N.D.   | no   |  |
| PT14-REC | 271 | A03REC | CD4_51 | Blood | P0 | CASSQGSRAQETQYF | TRBV19   | 48   | 632 | 7906  | N.D.    | N.D.   | no   |  |
| PT14-REC | 272 | A05REC | CD4_51 | Blood | P0 | CASSQGSRAQETQYF | TRBV19   | 48   | 374 | 3868  | N.D.    | N.D.   | no   |  |
| PT14-REC | 273 | B01REC | CD4_51 | Blood | P0 | CASSQGSRAQETQYF | TRBV19   | 48   | 410 | 6785  | N.D.    | N.D.   | no   |  |
| PT14-REC | 274 | B02REC | CD4_51 | Blood | P0 | CASSQGSRAQETQYF | TRBV19   | 48   | 452 | 4978  | N.D.    | N.D.   | no   |  |
| PT14-REC | 275 | B03REC | CD4_51 | Blood | P0 | CASSQGSRAQETQYF | TRBV19   | 48   | 322 | 8316  | N.D.    | N.D.   | no   |  |
| PT14-REC | 276 | B04REC | CD4_51 | Blood | P0 | CASSQGSRAQETQYF | TRBV19   | 48   | 510 | 2297  | N.D.    | N.D.   | no   |  |
| PT14-REC | 277 | B05REC | CD4_51 | Blood | P0 | CASSQGSRAQETQYF | TRBV19   | 48   | 345 | 8974  | N.D.    | N.D.   | no   |  |
| PT14-REC | 278 | B06REC | CD4_51 | Blood | P0 | CASSQGSRAQETQYF | TRBV19   | 48   | 488 | 6468  | N.D.    | N.D.   | no   |  |
| PT14-REC | 279 | C01REC | CD4_51 | Blood | P0 | CASSQGSRAQETQYF | TRBV19   | 48   | 496 | 7263  | N.D.    | N.D.   | no   |  |
| PT14-REC | 280 | C02REC | CD4_51 | Blood | P0 | CASSQGSRAQETQYF | TRBV19   | 48   | 452 | 7437  | N.D.    | N.D.   | no   |  |
| PT14-REC | 281 | C04REC | CD4_51 | Blood | P0 | CASSQGSRAQETQYF | TRBV19   | 48   | 392 | 11380 | N.D.    | N.D.   | no   |  |
| PT14-REC | 282 | C05REC | CD4_51 | Blood | P0 | CASSQGSRAQETQYF | TRBV19   | 48   | 374 | 11478 | N.D.    | N.D.   | no   |  |
| PT14-REC | 283 | C06REC | CD4_51 | Blood | P0 | CASSQGSRAQETQYF | TRBV19   | 48   | 549 | 5458  | N.D.    | N.D.   | no   |  |
| PT14-REC | 284 | E01REC | CD4_51 | Blood | P0 | CASSQGSRAQETQYF | TRBV19   | 48   | 513 | 4901  | N.D.    | N.D.   | no   |  |
| PT14-REC | 285 | D02REC | CD4_51 | Blood | P0 | CASSQGSRAQETQYF | TRBV19   | 48   | 363 | 7353  | N.D.    | N.D.   | no   |  |
| PT14-REC | 286 | D03REC | CD4_51 | Blood | P0 | CASSQGSRAQETQYF | TRBV19   | 48   | 472 | 2598  | N.D.    | N.D.   | no   |  |
| PT14-REC | 287 | D05REC | CD4_51 | Blood | P0 | CASSQGSRAQETQYF | TRBV19   | 48   | 494 | 7039  | N.D.    | N.D.   | no   |  |
| PT14-REC | 288 | D06REC | CD4_51 | Blood | P0 | CASSQGSRAQETQYF | TRBV19   | 48   | 323 | 8833  | N.D.    | N.D.   | no   |  |
| PT14-REC | 289 | F01REC | CD4_51 | Blood | P0 | CASSQGSRAQETQYF | TRBV19   | 48   | 408 | 8687  | N.D.    | N.D.   | no   |  |
| PT14-REC | 290 | E04REC | CD4_51 | Blood | P0 | CASSQGSRAQETQYF | TRBV19   | 48   | 443 | 2850  | N.D.    | N.D.   | no   |  |
| PT14-REC | 291 | E05REC | CD4_51 | Blood | P0 | CASSQGSRAQETQYF | TRBV19   | 48   | 311 | 5195  | N.D.    | N.D.   | no   |  |
| PT14-REC | 292 | E06REC | CD4_51 | Blood | P0 | CASSQGSRAQETQYF | TRBV19   | 48   | 368 | 9609  | N.D.    | N.D.   | no   |  |
| PT14-REC | 293 | F03REC | CD4_51 | Blood | P0 | CASSQGSRAQETQYF | TRBV19   | 48   | 456 | 10679 | N.D.    | N.D.   | no   |  |
| PT14-REC | 294 | F05REC | CD4_51 | Blood | P0 | CASSQGSRAQETQYF | TRBV19   | 48   | 307 | 8961  | N.D.    | N.D.   | no   |  |
| PT14-REC | 295 | G02REC | CD4_51 | Blood | P0 | CASSQGSRAQETQYF | TRBV19   | 48   | 276 | 11072 | N.D.    | N.D.   | no   |  |
| PT14-REC | 296 | G03REC | CD4_51 | Blood | P0 | CASSQGSRAQETQYF | TRBV19   | 48   | 288 | 12269 | N.D.    | N.D.   | no   |  |
| PT14-REC | 297 | G04REC | CD4_51 | Blood | P0 | CASSQGSRAQETQYF | TRBV19   | 48   | 474 | 4185  | N.D.    | N.D.   | no   |  |
| PT14-REC | 298 | G05REC | CD4_51 | Blood | P0 | CASSQGSRAQETQYF | TRBV19   | 48   | 588 | 11586 | N.D.    | N.D.   | no   |  |
| PT14-REC | 299 | G06REC | CD4_51 | Blood | P0 | CASSQGSRAQETQYF | TRBV19   | 48   | 494 | 1943  | N.D.    | N.D.   | no   |  |
| PT14-REC | 300 | H01REC | CD4_51 | Blood | P0 | CASSQGSRAQETQYF | TRBV19   | 48   | 573 | 7403  | N.D.    | N.D.   | no   |  |
| PT14-REC | 301 | H02REC | CD4_51 | Blood | P0 | CASSQGSRAQETQYF | TRBV19   | 48   | 472 | 5866  | N.D.    | N.D.   | no   |  |
| PT14-REC | 302 | H04REC | CD4_51 | Blood | P0 | CASSQGSRAQETQYF | TRBV19   | 48   | 608 | 5438  | N.D.    | N.D.   | no   |  |
| PT14-REC | 303 | E12REC | CD4_52 | Blood | P0 | CASSLGGPNEQYF   | TRBV7-8  | 39   | 254 | 2139  | N.D.    | N.D.   | no   |  |
| PT14-REC | 304 | A10REC | CD4_53 | Blood | P0 | CASSPPGAEQTYF   | TRBV5-1  | 42   | 118 | 2137  | N.D.    | N.D.   | no   |  |
| PT14-REC | 305 | A11REC | CD4_53 | Blood | P0 | CASSPPGAEQTYF   | TRBV5-1  | 42   | 125 | 4636  | N.D.    | N.D.   | no   |  |
| PT14-REC | 306 | E10REC | CD4_53 | Blood | P0 | CASSPPGAEQTYF   | TRBV5-1  | 42   | 128 | 1783  | N.D.    | HLA-DR | no   |  |
| PT14-REC | 307 | E11REC | CD4_53 | Blood | P0 | CASSPPGAEQTYF   | TRBV5-1  | 42   | 75  | 2173  | N.D.    | N.D.   | no   |  |
| PT14-REC | 308 | G10REC | CD4_53 | Blood | P0 | CASSPPGAEQTYF   | TRBV5-1  | 42   | 116 | 5063  | N.D.    | N.D.   | no   |  |
| PT14-REC | 309 | G08REC | CD4_54 | Blood | P0 | CASSDFGATVTEAFF | TRBV4-2  | 51   | 109 | 1001  | 136-150 | HLA-DP | no   |  |
| PT14-AC  | 310 | C08AC  | N.D.   | Blood | P0 | N.D.            | N.D.     | N.D. | 423 | 10614 | N.D.    | N.D.   | N.D. |  |
| PT14-AC  | 311 | D06AC  | N.D.   | Blood | P0 | N.D.            | N.D.     | N.D. | 151 | 7053  | N.D.    | N.D.   | N.D. |  |
| PT14-REC | 312 | H06REC | N.D.   | Blood | P0 | N.D.            | N.D.     | N.D. | 462 | 3130  | N.D.    | N.D.   | N.D. |  |
| PT1-AC   | 313 | E08AC  | CD4_55 | Blood | P2 | CATGEGDFYNEQFF  | TRBV15   | 39   | 812 | 29578 | 1-15    | HLA-DR | no   |  |
| PT1-AC   | 314 | D10AC  | CD4_55 | Blood | P2 | CATGEGDFYNEQFF  | TRBV15   | 39   | 678 | 14611 | 1-15    | HLA-DR | no   |  |
| PT1-AC   | 315 | F08AC  | CD4_58 | Blood | P2 | CASDRANYYTYF    | TRBV30   | 33   | 459 | 1360  | 111-125 | HLA-DR | no   |  |
| PT1-AC   | 316 | B11REC | CD4_58 | Blood | P2 | CASDRANYYTYF    | TRBV30   | 33   | 110 | 1600  | 111-125 | HLA-DR | no   |  |
| PT1-AC   | 317 | D02AC  | CD4_57 | Blood | P2 | CASMSLWETQYF    | TRBV2    | 33   | 182 | 3322  | 26-40   | HLA-DR | no   |  |
| PT1-AC   | 318 | F12REC | CD4_57 | Blood | P2 | CASMSLWETQYF    | TRBV2    | 33   | 135 | 1128  | 26-45   | HLA-DR | no   |  |
| PT1-AC   | 319 | A08AC  | CD4_58 | Blood | P2 | CASSLGGAGEQYF   | TRBV5-1  | 36   | 186 | 3635  | 111-125 | HLA-DR | no   |  |
| PT1-REC  | 320 | H07REC | CD4_59 | Blood | P2 | CASSPVRTATNEQFF | TRBV7-3  | 39   | 179 | 11391 | 26-40   | HLA-DR | yes  |  |
| PT1-AC   | 321 | E08AC  | CD4_59 | Blood | P2 | CASSPVRTATNEQFF | TRBV7-3  | 39   | 152 | 13781 | 26-40   | HLA-DR | no   |  |
| PT1-AC   | 322 | F01AC  | CD4_59 | Blood | P2 | CASSPVRTATNEQFF | TRBV7-3  | 39   | 154 | 5178  | 26-40   | HLA-DR | no   |  |
| PT1-AC   | 323 | H08AC  | CD4_60 | Blood | P2 | CASSVGHYTYF     | TRBV3    | 30   | 187 | 2393  | N.D.    | HLA-DR | no   |  |
| PT1-AC   | 324 | A02AC  | CD4_61 | Blood | P2 | CATSLSMPQHF     | TRBV24   | 33   | 111 | 5200  | 56-70   | HLA-DR | no   |  |
| PT1-AC   | 325 | A03AC  | CD4_61 | Blood | P2 | CATSLSMPQHF     | TRBV24   | 33   | 197 | 1262  | 56-70   | HLA-DR | no   |  |
| PT1-AC   | 326 | H05AC  | CD4_61 | Blood | P2 | CATSLSMPQHF     | TRBV24   | 33   | 137 | 1559  | 56-70   | HLA-DR | no   |  |
| PT1-REC  | 327 | A10REC | CD4_62 | Blood | P2 | CAITTSANNYYTYF  | TRBV10-3 | 36   | 126 | 2362  | 26-40   | HLA-DR | no   |  |
| PT1-REC  | 328 | D12REC | CD4_62 | Blood | P2 | CAITTSANNYYTYF  | TRBV10-3 | 36   | 118 | 6658  | 26-40   | HLA-DR | no   |  |
| PT1-REC  | 329 | A05REC | CD4_62 | Blood | P2 | CAITTSANNYYTYF  | TRBV10-3 | 36   | 310 | 9371  | 26-45   | N.D.   | no   |  |
| PT1-REC  | 330 | A07REC | CD4_62 | Blood | P2 | CAITTSANNYYTYF  | TRBV10-3 | 36   | 178 | 7547  | 26-45   | HLA-DR | no   |  |
| PT1-REC  | 331 | C05REC | CD4_62 | Blood | P2 | CAITTSANNYYTYF  | TRBV10-3 | 36   | 121 | 3593  | 26-45   | HLA-DR | no   |  |
| PT1-REC  | 332 | D02REC | CD4_62 | Blood | P2 | CAITTSANNYYTYF  | TRBV10-3 | 36   | 231 | 6459  | 26-45   | HLA-DR | no   |  |
| PT1-REC  | 333 | D05REC | CD4_62 | Blood | P2 | CAITTSANNYYTYF  | TRBV10-3 | 36   | 261 | 7597  | 26-45   | N.D.   | no   |  |
| PT1-REC  | 334 | D09REC | CD4_62 | Blood | P2 | CAITTSANNYYTYF  | TRBV10-3 | 36   | 92  | 2430  | 26-45   | HLA-DR | no   |  |
| PT1-REC  | 335 | D10REC | CD4_62 | Blood | P2 | CAITTSANNYYTYF  | TRBV10-3 | 36   | 367 | 6576  | 26-45   | HLA-DR | no   |  |
| PT1-REC  | 336 | E04REC | CD4_62 | Blood | P2 | CAITTSANNYYTYF  | TRBV10-3 | 36   | 265 | 9307  | 26-45   | N.D.   | no   |  |
| PT1-REC  | 337 | E07REC | CD4_62 | Blood | P2 | CAITTSANNYYTYF  | TRBV10-3 | 36   | 148 | 4034  | 26-45   | HLA-DR | no   |  |
| PT1-REC  | 338 | E09REC | CD4_62 | Blood | P2 | CAITTSANNYYTYF  | TRBV10-3 | 36   | 187 | 6345  | 26-45   | HLA-DR | no   |  |
| PT1-REC  | 339 | E12REC | CD4_62 | Blood | P2 | CAITTSANNYYTYF  | TRBV10-3 | 36   | 126 | 4280  | 26-45   | HLA-DR | no   |  |
| PT1-REC  | 340 | F08REC | CD4_62 | Blood | P2 | CAITTSANNYYTYF  | TRBV10-3 | 36   | 176 | 1069  | 26-45   | HLA-DR | no   |  |
| PT1-REC  | 341 | H03REC | CD4_62 | Blood | P2 | CAITTSANNYYTYF  | TRBV10-3 | 36   | 206 | 8305  | 26-45   | N.D.   | no   |  |
| PT1-REC  | 342 | A03REC | CD4_62 | Blood | P2 | CAITTSANNYYTYF  | TRBV10-3 | 36   | 160 | 3190  | 26-45   | HLA-DR | no   |  |
| PT1-REC  | 343 | A06REC | CD4_63 | Blood | P2 | CASIRARPEYQYF   | TRBV6-2  | 33   | 137 | 5203  | 81-95   | HLA-DR | no   |  |
| PT1-REC  | 344 | C10REC | CD4_64 | Blood | P2 | CASSLRMDTEAFF   | TRBV5-1  | 33   | 177 | 2781  | 26-40   | HLA-DR | no   |  |
| PT1-REC  | 345 | D07REC | CD4_65 | Blood | P2 | CTISLQNETAFF    | TRBV5-1  | 33   | 112 | 2462  | 1-15    | HLA-DR | no   |  |
| PT1-AC   | 346 | A07AC  | N.D.   | Blood | P2 | N.D.            | N.D.     | N.D. | 186 | 9294  | N.D.    | HLA-DR | N.D. |  |
| PT1-AC   | 347 | C03AC  | N.D.   | Blood | P2 | N.D.            | N.D.     | N.D. | 201 | 6187  | N.D.    | HLA-DR | N.D. |  |
| PT1-AC   | 348 | H03AC  | N.D.   | Blood | P2 | N.D.            | N.D.     | N.D. | 488 | 4317  | N.D.    | N.D.   | N.D. |  |
| PT1-REC  | 349 | C07REC | N.D.   | Blood | P2 | N.D.            | N.D.     | N.D. | 89  | 2773  | 111-125 | HLA-DR | N.D. |  |
| PT1-REC  | 350 | B12REC | N.D.   | Blood | P2 | N.D.            | N.D.     | N.D. | 247 | 12781 | 26-40   | HLA-DR | N.D. |  |
| PT1-REC  | 351 | C05REC | N.D.   | Blood | P2 | N.D.            | N.D.     | N.D. | 133 | 11091 | 26-40   | HLA-DR | N.D. |  |
| PT1-REC  | 352 | D03REC | N.D.   | Blood | P2 | N.D.            | N.D.     | N.D. | 207 | 6970  | 26-40   | HLA-DR | N.D. |  |
| PT1-REC  | 353 | G04REC | N.D.   | Blood | P2 | N.D.            | N.D.     | N.D. | 207 | 8459  | 26-40   | HLA-DR | N.D. |  |
| PT1-REC  | 354 | G08REC | N.D.   | Blood | P2 | N.D.            | N.D.     | N.D. | 167 | 6422  | 26-40   | HLA-DR | N.D. |  |
| PT1-REC  | 355 | G12REC | N.D.   | Blood | P2 | N.D.            | N.D.     | N.D. | 103 | 5086  | 26-40   | HLA-DR | N.D. |  |
| PT1-REC  | 356 | A02REC | N.D.   | Blood | P2 | N.D.            | N.D.     | N.D. | 132 | 8050  | N.D.    | HLA-DR | N.D. |  |
| PT1-REC  | 357 | D11REC | N.D.   | Blood | P2 | N.D.            | N.D.     | N.D. | 167 | 2808  | N.D.    | HLA-DR | N.D. |  |
| PT1-REC  | 358 | H05REC | N.D.   | Blood | P2 | N.D.            | N.D.     | N.D. | 145 | 1321  | N.D.    | N.D.   | N.D. |  |
| PT1-REC  | 359 | C01REC | N.D.   | Blood | P2 | N.D.            | N.D.     | N.D. | 144 | 3893  | 36-50   | HLA-DR | N.D. |  |
| PT2-AC   | 360 | B07AC  | CD4_66 | Blood | P2 | CASSQVGGDTQYF   | TRBV3    | 3    |     |       |         |        |      |  |

|         |     |         |        |       |        |                   |          |      |      |       |         |        |        |    |
|---------|-----|---------|--------|-------|--------|-------------------|----------|------|------|-------|---------|--------|--------|----|
| P12-REC | 389 | C08REC  | CD4_71 | Blood | P2     | CASSPISAVNSPLHF   | TRBV18   | 39   | 363  | 2785  | N.D.    | N.D.   | no     |    |
| P12-REC | 390 | H07REC  | CD4_71 | Blood | P2     | CASSPISAVNSPLHF   | TRBV18   | 39   | 379  | 13682 | 1-15    | HLA-DR | no     |    |
| P12-REC | 391 | H01REC  | CD4_71 | Blood | P2-CMV | CASSPISAVNSPLHF   | TRBV18   | 39   | 650  | 19556 | 1-15    | HLA-DR | no     |    |
| P12-REC | 392 | A03REC  | CD4_72 | Blood | P2     | CASSPQONTYF       | TRBV5-1  | 30   | 871  | 15328 | N.D.    | N.D.   | no     |    |
| P12-REC | 393 | A01REC  | CD4_72 | Blood | P2     | CASSPQONTYF       | TRBV5-1  | 30   | 699  | 5040  | N.D.    | N.D.   | no     |    |
| P12-REC | 394 | A02REC  | CD4_72 | Blood | P2     | CASSPQONTYF       | TRBV5-1  | 30   | 567  | 7737  | N.D.    | N.D.   | no     |    |
| P12-REC | 395 | B03REC  | CD4_72 | Blood | P2     | CASSPQONTYF       | TRBV5-1  | 30   | 538  | 18955 | N.D.    | N.D.   | no     |    |
| P12-REC | 396 | B07REC  | CD4_72 | Blood | P2     | CASSPQONTYF       | TRBV5-1  | 30   | 533  | 9969  | N.D.    | N.D.   | no     |    |
| P12-REC | 397 | B11REC  | CD4_72 | Blood | P2     | CASSPQONTYF       | TRBV5-1  | 30   | 474  | 29565 | N.D.    | N.D.   | no     |    |
| P12-REC | 398 | C05REC  | CD4_72 | Blood | P2     | CASSPQONTYF       | TRBV5-1  | 30   | 463  | 14961 | N.D.    | N.D.   | no     |    |
| P12-REC | 399 | C09REC  | CD4_72 | Blood | P2     | CASSPQONTYF       | TRBV5-1  | 30   | 444  | 13040 | N.D.    | N.D.   | no     |    |
| P12-REC | 400 | C11REC  | CD4_72 | Blood | P2     | CASSPQONTYF       | TRBV5-1  | 30   | 341  | 5657  | N.D.    | N.D.   | no     |    |
| P12-REC | 401 | C02REC  | CD4_72 | Blood | P2     | CASSPQONTYF       | TRBV5-1  | 30   | 567  | 12816 | N.D.    | N.D.   | no     |    |
| P12-REC | 402 | D04REC  | CD4_72 | Blood | P2     | CASSPQONTYF       | TRBV5-1  | 30   | 359  | 10526 | N.D.    | N.D.   | no     |    |
| P12-REC | 403 | D05REC  | CD4_72 | Blood | P2     | CASSPQONTYF       | TRBV5-1  | 30   | 334  | 12666 | N.D.    | N.D.   | no     |    |
| P12-REC | 404 | D01REC  | CD4_72 | Blood | P2     | CASSPQONTYF       | TRBV5-1  | 30   | 652  | 2471  | N.D.    | N.D.   | no     |    |
| P12-REC | 405 | E05REC  | CD4_72 | Blood | P2     | CASSPQONTYF       | TRBV5-1  | 30   | 456  | 25295 | N.D.    | N.D.   | no     |    |
| P12-REC | 406 | E08REC  | CD4_72 | Blood | P2     | CASSPQONTYF       | TRBV5-1  | 30   | 303  | 19099 | N.D.    | N.D.   | no     |    |
| P12-REC | 407 | E11REC  | CD4_72 | Blood | P2     | CASSPQONTYF       | TRBV5-1  | 30   | 484  | 7012  | N.D.    | N.D.   | no     |    |
| P12-REC | 408 | E12REC  | CD4_72 | Blood | P2     | CASSPQONTYF       | TRBV5-1  | 30   | 485  | 10079 | N.D.    | N.D.   | no     |    |
| P12-REC | 409 | F11REC  | CD4_72 | Blood | P2     | CASSPQONTYF       | TRBV5-1  | 30   | 355  | 17372 | N.D.    | N.D.   | no     |    |
| P12-REC | 410 | F01REC  | CD4_72 | Blood | P2     | CASSPQONTYF       | TRBV5-1  | 30   | 626  | 30941 | N.D.    | N.D.   | no     |    |
| P12-REC | 411 | C02REC  | CD4_72 | Blood | P2     | CASSPQONTYF       | TRBV5-1  | 30   | 392  | 11407 | N.D.    | N.D.   | no     |    |
| P12-REC | 412 | G03REC  | CD4_72 | Blood | P2     | CASSPQONTYF       | TRBV5-1  | 30   | 456  | 16353 | N.D.    | N.D.   | no     |    |
| P12-REC | 413 | G10REC  | CD4_72 | Blood | P2     | CASSPQONTYF       | TRBV5-1  | 30   | 437  | 14066 | N.D.    | N.D.   | no     |    |
| P12-REC | 414 | H02REC  | CD4_72 | Blood | P2     | CASSPQONTYF       | TRBV5-1  | 30   | 541  | 15641 | N.D.    | N.D.   | no     |    |
| P12-REC | 415 | H04REC  | CD4_72 | Blood | P2     | CASSPQONTYF       | TRBV5-1  | 30   | 543  | 21745 | N.D.    | N.D.   | no     |    |
| P12-REC | 416 | H10REC  | CD4_72 | Blood | P2     | CASSPQONTYF       | TRBV5-1  | 30   | 656  | 24563 | N.D.    | N.D.   | no     |    |
| P12-REC | 417 | H11REC  | CD4_72 | Blood | P2     | CASSPQONTYF       | TRBV5-1  | 30   | 469  | 17340 | N.D.    | N.D.   | no     |    |
| P12-REC | 418 | H01REC  | CD4_72 | Blood | P2     | CASSPQONTYF       | TRBV5-1  | 30   | 488  | 24934 | N.D.    | N.D.   | no     |    |
| P12-REC | 419 | A10REC  | CD4_72 | Blood | P2     | CASSPQONTYF       | TRBV5-1  | 30   | 353  | 10744 | 1-15    | HLA-DR | no     |    |
| P12-REC | 420 | B08REC  | CD4_72 | Blood | P2     | CASSPQONTYF       | TRBV5-1  | 30   | 521  | 13561 | 1-15    | HLA-DR | no     |    |
| P12-REC | 421 | F02REC  | CD4_72 | Blood | P2     | CASSPQONTYF       | TRBV5-1  | 30   | 381  | 19349 | 1-15    | HLA-DR | no     |    |
| P12-REC | 422 | F04REC  | CD4_72 | Blood | P2     | CASSPQONTYF       | TRBV5-1  | 30   | 277  | 8103  | 1-15    | HLA-DR | no     |    |
| P12-REC | 423 | F09REC  | CD4_72 | Blood | P2     | CASSPQONTYF       | TRBV5-1  | 30   | 475  | 11271 | 1-15    | HLA-DR | no     |    |
| P12-REC | 424 | A11REC  | CD4_72 | Blood | P2     | CASSPQONTYF       | TRBV5-1  | 30   | 314  | 17697 | 1-15    | HLA-DR | no     |    |
| P12-REC | 425 | C08REC  | CD4_73 | Blood | P2     | CASSQVGYGYTF      | TRBV3    | 33   | 587  | 32960 | 1-15    | HLA-DR | no     |    |
| P12-REC | 426 | D06REC  | CD4_73 | Blood | P2     | CASSQVGYGYTF      | TRBV3    | 33   | 534  | 12931 | 1-15    | HLA-DR | no     |    |
| P12-REC | 427 | H09REC  | CD4_73 | Blood | P2     | CASSQVGYGYTF      | TRBV3    | 33   | 586  | 8922  | 1-15    | HLA-DR | no     |    |
| P12-REC | 428 | A04REC  | CD4_73 | Blood | P2     | CASSQVGYGYTF      | TRBV3    | 33   | 2229 | 35270 | 1-15    | HLA-DR | no     |    |
| P12-REC | 429 | A07REC  | CD4_74 | Blood | P2     | CASSVWRGGQNTYEAFF | TRBV2    | 45   | 650  | 18145 | N.D.    | N.D.   | no     |    |
| P12-REC | 430 | A02REC  | N.D.   | Blood | P2     | N.D.              | N.D.     | N.D. | 587  | 7737  | N.D.    | N.D.   | N.D.   |    |
| P12-REC | 431 | A01REC  | N.D.   | Blood | P2     | N.D.              | N.D.     | N.D. | 699  | 5040  | N.D.    | N.D.   | N.D.   |    |
| P12-REC | 432 | A07REC  | N.D.   | Blood | P2     | N.D.              | N.D.     | N.D. | 500  | 18145 | N.D.    | N.D.   | N.D.   |    |
| P12-REC | 433 | B09REC  | N.D.   | Blood | P2     | N.D.              | N.D.     | N.D. | 423  | 4343  | N.D.    | N.D.   | N.D.   |    |
| P12-REC | 434 | B12REC  | N.D.   | Blood | P2     | N.D.              | N.D.     | N.D. | 427  | 13686 | N.D.    | N.D.   | N.D.   |    |
| P12-REC | 435 | E07REC  | N.D.   | Blood | P2     | N.D.              | N.D.     | N.D. | 519  | 6198  | N.D.    | N.D.   | N.D.   |    |
| P12-REC | 436 | F06REC  | N.D.   | Blood | P2     | N.D.              | N.D.     | N.D. | 334  | 21825 | N.D.    | N.D.   | N.D.   |    |
| P12-REC | 437 | G01REC  | N.D.   | Blood | P2     | N.D.              | N.D.     | N.D. | 452  | 6728  | N.D.    | N.D.   | N.D.   |    |
| P12-REC | 438 | A05REC  | N.D.   | Blood | P2     | N.D.              | N.D.     | N.D. | 636  | 20606 | N.D.    | N.D.   | N.D.   |    |
| P12-REC | 439 | D01REC3 | CD4_75 | Blood | P2-CMV | CAGRDSELSQYF      | TRBV30   | 39   | 384  | 3707  | N.D.    | N.D.   | no     |    |
| P12-REC | 440 | C05REC3 | CD4_76 | Blood | P2-CMV | CASSFGAGSSYEQYF   | TCRBV28  | 48   | 140  | 2447  | N.D.    | N.D.   | HLA-DR | no |
| P12-REC | 441 | D06REC3 | CD4_77 | Blood | P2     | CAWRDQNTYEAFF     | TRBV30   | 39   | 735  | 1263  | N.D.    | N.D.   | no     |    |
| P12-REC | 442 | D06REC3 | CD4_77 | Blood | P2-CMV | CAWRDQNTYEAFF     | TRBV30   | 39   | 158  | 2082  | N.D.    | N.D.   | no     |    |
| P12-REC | 443 | D11REC1 | CD4_77 | Blood | P2     | CAWRDQNTYEAFF     | TRBV30   | 39   | 229  | 1467  | N.D.    | N.D.   | no     |    |
| P12-REC | 444 | A11REC3 | CD4_78 | Blood | P2-CMV | CAWSSGGYEQYF      | TRBV30   | 39   | 136  | 2777  | N.D.    | N.D.   | no     |    |
| P12-REC | 445 | A06REC3 | CD4_79 | Blood | P2-CMV | CAHWVSPGNTYEAFF   | TRBV30   | 45   | 105  | 1940  | N.D.    | N.D.   | no     |    |
| P12-REC | 446 | A03REC3 | N.D.   | Blood | P2-CMV | N.D.              | N.D.     | N.D. | 161  | 1197  | N.D.    | N.D.   | N.D.   |    |
| P12-REC | 447 | D02REC3 | N.D.   | Blood | P2-CMV | N.D.              | N.D.     | N.D. | 100  | 3622  | N.D.    | N.D.   | N.D.   |    |
| P12-REC | 448 | D03REC3 | N.D.   | Blood | P2-CMV | N.D.              | N.D.     | N.D. | 158  | 1350  | N.D.    | N.D.   | N.D.   |    |
| P12-REC | 449 | D04REC3 | N.D.   | Blood | P2-CMV | N.D.              | N.D.     | N.D. | 156  | 1712  | N.D.    | N.D.   | N.D.   |    |
| P12-REC | 450 | D03REC1 | N.D.   | Blood | P2-CMV | N.D.              | N.D.     | N.D. | 173  | 1500  | N.D.    | N.D.   | N.D.   |    |
| P12-REC | 451 | E04REC1 | CD4_80 | Blood | P2-CMV | CASSLRTSSVNSPLHF  | TRBV5-6  | 54   | 173  | 1347  | N.D.    | N.D.   | HLA-DR | no |
| P12-REC | 452 | F07REC1 | CD4_19 | Blood | P2     | CATWGGKQLNTEAFF   | TRBV27   | 45   | 126  | 1942  | N.D.    | N.D.   | no     |    |
| P12-REC | 453 | B06REC1 | CD4_19 | Blood | P2     | CATWGGKQLNTEAFF   | TRBV27   | 45   | 152  | 1964  | N.D.    | N.D.   | no     |    |
| P12-REC | 454 | E12REC1 | N.D.   | Blood | P2     | N.D.              | N.D.     | N.D. | 162  | 10335 | N.D.    | N.D.   | N.D.   |    |
| P12-REC | 455 | A03REC  | CD4_81 | Blood | P2     | CASSLALGGTEAFF    | TRBV11-1 | 39   | 392  | 1047  | N.D.    | N.D.   | no     |    |
| P12-REC | 456 | A04REC  | CD4_81 | Blood | P2     | CASSLALGGTEAFF    | TRBV11-1 | 39   | 321  | 1994  | N.D.    | N.D.   | no     |    |
| P12-REC | 457 | B01REC  | CD4_81 | Blood | P2     | CASSLALGGTEAFF    | TRBV11-1 | 39   | 299  | 5937  | N.D.    | N.D.   | no     |    |
| P12-REC | 458 | B02REC  | CD4_81 | Blood | P2     | CASSLALGGTEAFF    | TRBV11-1 | 39   | 336  | 2940  | N.D.    | N.D.   | no     |    |
| P12-REC | 459 | B05REC  | CD4_81 | Blood | P2     | CASSLALGGTEAFF    | TRBV11-1 | 39   | 317  | 14488 | N.D.    | N.D.   | no     |    |
| P12-REC | 460 | B09REC  | CD4_81 | Blood | P2     | CASSLALGGTEAFF    | TRBV11-1 | 39   | 281  | 8235  | N.D.    | N.D.   | no     |    |
| P12-REC | 461 | C01REC  | CD4_81 | Blood | P2     | CASSLALGGTEAFF    | TRBV11-1 | 39   | 424  | 16117 | N.D.    | N.D.   | no     |    |
| P12-REC | 462 | C03REC  | CD4_81 | Blood | P2     | CASSLALGGTEAFF    | TRBV11-1 | 39   | 449  | 3356  | N.D.    | N.D.   | no     |    |
| P12-REC | 463 | C05REC  | CD4_81 | Blood | P2     | CASSLALGGTEAFF    | TRBV11-1 | 39   | 237  | 1484  | N.D.    | N.D.   | no     |    |
| P12-REC | 464 | C08REC  | CD4_81 | Blood | P2     | CASSLALGGTEAFF    | TRBV11-1 | 39   | 384  | 8195  | N.D.    | N.D.   | no     |    |
| P12-REC | 465 | D01REC  | CD4_81 | Blood | P2     | CASSLALGGTEAFF    | TRBV11-1 | 39   | 326  | 1148  | N.D.    | N.D.   | no     |    |
| P12-REC | 466 | D02REC  | CD4_81 | Blood | P2     | CASSLALGGTEAFF    | TRBV11-1 | 39   | 346  | 8265  | N.D.    | N.D.   | no     |    |
| P12-REC | 467 | D04REC  | CD4_81 | Blood | P2     | CASSLALGGTEAFF    | TRBV11-1 | 39   | 307  | 1022  | N.D.    | N.D.   | no     |    |
| P12-REC | 468 | D06REC  | CD4_81 | Blood | P2     | CASSLALGGTEAFF    | TRBV11-1 | 39   | 283  | 6610  | N.D.    | N.D.   | no     |    |
| P12-REC | 469 | E04REC  | CD4_81 | Blood | P2     | CASSLALGGTEAFF    | TRBV11-1 | 39   | 264  | 1034  | N.D.    | N.D.   | no     |    |
| P12-REC | 470 | F02REC  | CD4_81 | Blood | P2     | CASSLALGGTEAFF    | TRBV11-1 | 39   | 338  | 7663  | N.D.    | N.D.   | no     |    |
| P12-REC | 471 | F03REC  | CD4_81 | Blood | P2     | CASSLALGGTEAFF    | TRBV11-1 | 39   | 389  | 1787  | N.D.    | N.D.   | no     |    |
| P12-REC | 472 | F04REC  | CD4_81 | Blood | P2     | CASSLALGGTEAFF    | TRBV11-1 | 39   | 363  | 2819  | N.D.    | N.D.   | no     |    |
| P12-REC | 473 | F06REC  | CD4_81 | Blood | P2     | CASSLALGGTEAFF    | TRBV11-1 | 39   | 283  | 4727  | N.D.    | N.D.   | no     |    |
| P12-REC | 474 | F06REC  | CD4_81 | Blood | P2     | CASSLALGGTEAFF    | TRBV11-1 | 39   | 275  | 2208  | N.D.    | N.D.   | no     |    |
| P12-REC | 475 | G01REC  | CD4_81 | Blood | P2     | CASSLALGGTEAFF    | TRBV11-1 | 39   | 613  | 4897  | N.D.    | N.D.   | no     |    |
| P12-REC | 476 | G04REC  | CD4_81 | Blood | P2     | CASSLALGGTEAFF    | TRBV11-1 | 39   | 325  | 7161  | N.D.    | N.D.   | no     |    |
| P12-REC | 477 | C07REC  | CD4_81 | Blood | P2     | CASSLALGGTEAFF    | TRBV11-1 | 39   | 378  | 1242  | N.D.    | N.D.   | no     |    |
| P12-REC | 478 | H02REC  | CD4_81 | Blood | P2     | CASSLALGGTEAFF    | TRBV11-1 | 39   | 531  | 3418  | N.D.    | N.D.   | no     |    |
| P12-REC | 479 | H03REC  | CD4_81 | Blood | P2     | CASSLALGGTEAFF    | TRBV11-1 | 39   | 442  | 5065  | N.D.    | N.D.   | no     |    |
| P12-REC | 480 | H05REC  | CD4_81 | Blood | P2     | CASSLALGGTEAFF    | TRBV11-1 | 39   | 302  | 2537  | N.D.    | N.D.   | no     |    |
| P12-REC | 481 | A03REC  | CD4_81 | Blood | P2     | CASSLALGGTEAFF    | TRBV11-1 | 39   | 287  | 7749  | N.D.    | N.D.   | no     |    |
| P12-REC | 482 | A06REC  | CD4_81 | Blood | P2     | CASSLALGGTEAFF    | TRBV11-1 | 39   | 245  | 1160  | N.D.    | N.D.   | no     |    |
| P12-REC | 483 | B05REC  | CD4_81 | Blood | P2     | CASSLALGGTEAFF    | TRBV11-1 | 39   | 233  | 1422  | N.D.    | N.D.   | no     |    |
| P12-REC | 484 | C01REC  | CD4_81 | Blood | P2     | CASSLALGGTEAFF    | TRBV11-1 | 39   | 234  | 1625  | N.D.    | N.D.   | no     |    |
| P12-REC | 485 | C02REC  | CD4_81 | Blood | P2     | CASSLALGGTEAFF    | TRBV11-1 | 39   | 226  | 1050  | N.D.    | N.D.   | no     |    |
| P12-REC | 486 | C04REC  | CD4_81 | Blood | P2     | CASSLALGGTEAFF    | TRBV11-1 | 39   | 273  | 4540  | N.D.    | N.D.   | no     |    |
| P12-REC | 487 | D05REC  | CD4_81 | Blood | P2     | CASSLALGGTEAFF    | TRBV11-1 | 39   | 284  | 9278  | 1-15    | HLA-DR | no     |    |
| P12-REC | 488 | A05REC  | CD4_81 | Blood | P2     | CASSLALGGTEAFF    | TRBV11-1 | 39   | 372  | 7716  | 1-15    | HLA-DR | no     |    |
| P12-REC | 489 | B04REC  | CD4_82 | Blood | P2     | CASSLGGASSPLHF    | TRBV3    | 36   | 241  | 3099  | 121-132 | HLA-DR | no     |    |
| P12-REC | 490 | C02REC  | CD4_82 | Blood | P2     | CASSLGGASSPLHF    | TRBV3    | 36   | 275  | 13560 | 121-132 | HLA-DR | no     |    |
| P12-REC | 491 | F01REC  | CD4_83 | Blood | P2     | CASSVWGGKTDQYF    | TRBV2    | 39   | 568  | 1974  | 1-15    | HLA-DR | no     |    |
| P12-REC | 492 | A02REC  | N.D.   | Blood | P2     | N.D.              | N.D.     | N.D. |      |       |         |        |        |    |











|         |      |         |         |       |          |                   |          |      |  |     |      |      |      |      |
|---------|------|---------|---------|-------|----------|-------------------|----------|------|--|-----|------|------|------|------|
| PT14-AC | 1039 | D12AC   | CD8_17  | Blood | PMP22    | CASSLRTGELFF      | TRBV27   | 36   |  | 212 | 4642 | N.D. | N.D. | N.D. |
| PT14-AC | 1040 | F04AC   | CD8_17  | Blood | PMP22    | CASSLRTGELFF      | TRBV27   | 36   |  | 73  | 1173 | N.D. | N.D. | N.D. |
| PT14-AC | 1041 | G08AC   | CD8_17  | Blood | PMP22    | CASSLRTGELFF      | TRBV27   | 36   |  | 127 | 1402 | N.D. | N.D. | N.D. |
| PT14-AC | 1042 | H08AC   | CD8_17  | Blood | PMP22    | CASSLRTGELFF      | TRBV27   | 36   |  | 120 | 1802 | N.D. | N.D. | N.D. |
| PT2-REC | 1043 | B03REC3 | N.D.    | Blood | CMV-PGP2 | N.D.              | N.D.     | N.D. |  | 192 | 2414 | N.D. | N.D. | N.D. |
| PT2-REC | 1044 | A02REC3 | N.D.    | Blood | CMV-PGP2 | N.D.              | N.D.     | N.D. |  | 199 | 2216 | N.D. | N.D. | N.D. |
| PT2-REC | 1045 | G01REC3 | CD4_167 | Blood | CMV-PGP2 | CASSQVSAQGLGYGYTF | TRBV4-3  | 51   |  | 365 | 2439 | N.D. | N.D. | no   |
| PT2-REC | 1046 | B06REC3 | CD4_168 | Blood | CMV      | CASSQQSSANTHF     | TRBV10-2 | 42   |  | 140 | 2064 | N.D. | N.D. | no   |
| PT2-REC | 1047 | B01REC3 | CD4_169 | Blood | CMV      | CASSLTSQYGYTF     | TRBV12-3 | 39   |  | 150 | 1355 | N.D. | N.D. | no   |
| PT2-REC | 1048 | F12REC1 | N.D.    | Blood | CMV      | N.D.              | N.D.     | N.D. |  | 150 | 1548 | N.D. | N.D. | N.D. |

N.D. = not determined

### **Supplementary Table 3**

**Frequencies of CDR3 $\beta$  lengths.** Frequency of *TCRB* complementarity-determining region 3 (CDR3 $\beta$ ) length of clonotypes reactive to PNS-myelin antigens (n = 166), SARS-CoV-2 antigens from post-COVID-19 GBS patients (n = 92) as well as TCR $\beta$  clonotypes identified in microbe-reactive CFSE<sup>low</sup> fractions from HD. The original data sources are indicated.



**Supplementary Table 4**

**HLA haplotypes of GBS patients.** Human leukocyte antigen (HLA) typing of the GBS patients included in the study.



|      | DRB1        | DRB3        | DRB4         | DRB5        | DQB1        | DQA1        | DPB1         | DPA1        | HLA-A       | HLA-B       | HLA-C       |
|------|-------------|-------------|--------------|-------------|-------------|-------------|--------------|-------------|-------------|-------------|-------------|
| PT1  | 11:04:01:01 | 02:02:01:02 |              | 01:01:01:01 | 06:02:01:01 | 01:02:01:10 | 02:01:02:01  | 01:03:01:04 | 01:01:01:01 | 07:02:01:01 | 04:01:01:06 |
|      | 15:01:01:01 |             |              |             | 06:03:01:01 | 01:03:01:02 | 04:01:01:01  | 02:01:01:02 | 02:01:01:01 | 35:02:01:01 | 07:02:01:03 |
| PT2  | 10:01:01:01 | 02:02:01:14 |              |             | 03:01:01:03 | 01:05:01:02 | 17:01:01:01  | 02:01:01:03 | 24:02:01:01 | 45:01:01:01 | 06:02:01:01 |
|      | 11:01:02:01 |             |              |             | 05:01:01:02 | 05:11:01:01 | 105:01:01:01 | 03:01:01:05 | 68:01:01:02 | 58:02:01:01 | 16:01:01:01 |
| PT3  | 03:01:01:01 | 01:01:02:01 |              |             | 02:01:01:01 | 04:01:01:01 | 04:01:01:01  | 01:03:01:02 | 02:01:01:01 | 08:01:01:01 | 07:01:01:01 |
|      | 08:01:01:01 |             |              |             | 04:02:01:01 | 05:01:01:02 | 11:01:01:01  | 02:01:01:01 | 24:02:01:01 | 51:01:01:03 | 14:02:01:01 |
| PT4  | 13:02:01:02 | 03:01:01:01 |              | 01:01:01:01 | 06:02:01:01 | 01:02:01:01 | 03:01:01:01  | 01:03:01:03 | 02:01:01:01 | 07:02:01:01 | 03:04:01:01 |
|      | 15:01:01:01 |             |              |             | 06:04:01:01 | 01:02:01:04 | 04:01:01:01  | 01:03:01:04 | 03:01:01:01 | 40:01:02:01 | 07:02:01:20 |
| PT5  | 11:01:01:01 | 02:02:01:02 |              |             | 03:01:01:03 | 01:02:01:04 | 02:01:02:01  | 01:03:01:01 | 01:01:01:01 | 35:03:01:01 | 04:01:01:01 |
|      | 13:02:01:02 | 03:01:01:01 |              |             | 06:04:01:01 | 05:05:01:01 | 02:01:02:01  | 01:03:01:01 | 02:01:01:01 | 44:02:01:03 | 07:04:01:01 |
| PT6  | 07:01:01:01 | 02:02:01:02 | 01:03:01:02N |             | 03:01:01:03 | 02:01:01:01 | 03:01:01:01  | 01:03:01:03 | 01:01:01:01 | 18:01:01:02 | 06:02:01:01 |
|      | 11:04:01:01 |             |              |             | 03:03:02:01 | 05:05:01:01 | 13:01:01:02  | 2:01:04     | 02:01:01:01 | 57:01:01:01 | 07:01:01:01 |
| PT7  | 01:01:01:01 |             | 01:03:01:01  |             | 03:01:01:01 | 01:01:01:01 | 04:01:01:83  | 01:03:01:02 | 02:01:01:01 | 35:01:01:02 | 04:01:01:01 |
|      | 04:01:01:01 |             |              |             | 05:01:01:03 | 03:03:01:01 | 104:01:01:03 | 01:03:01:12 | 32:01:01:01 | 44:02:01:01 | 05:01:01:02 |
| PT8  | 04:01:01:01 |             | 01:03:01:01  | 2:02:01     | 03:01:01:01 | 01:02:02:01 | 04:01:01:01  | 01:03:01:04 | 02:01:01:01 | 40:02:01:01 | 02:02:02:01 |
|      | 16:01:01:01 |             |              |             | 05:02:01:01 | 03:03:01:01 | 04:01:01:01  | 01:03:01:04 | 03:01:01:01 | 44:02:01:01 | 05:01:01:02 |
| PT9  | 04:01:01:01 |             | 01:03:01:01  |             | 02:02:01:01 | 02:01:01:01 | 04:01:01:01  | 01:03:01:02 | 02:01:01:01 | 13:02:01:01 | 06:02:01:01 |
|      | 07:01:01:01 |             |              |             | 03:02:01:01 | 03:01:01:01 | 04:01:01:01  | 01:03:01:02 | 24:02:01:01 | 51:01:01:01 | 15:02:01:01 |
| PT10 | 03:01:01:01 | 01:01:02:01 |              |             | 02:01:01:01 | 01:04:01:01 | 04:02:01:02  | 01:03:01:05 | 01:01:01:01 | 08:01:01:01 | 07:01:01:01 |
|      | 14:54:01:01 | 02:02:01:03 |              |             | 05:03:01:01 | 05:01:01:02 | 09:01:01:01  | 02:01:01:02 | 11:01:01:01 | 18:03:01:01 | 07:01:01:01 |
| PT11 | 04:07:01:01 |             | 01:03:01:01  | 1:02:01     | 03:01:01:01 | 01:03:01:01 | 03:01:01:01  | 01:03:01:03 | 01:01:01:01 | 38:01:01:01 | 12:02:02:01 |
|      | 15:02:01:02 |             |              |             | 06:01:01:01 | 03:03:01:01 | 04:01:01:41  | 02:07:01:01 | 03:01:01:01 | 52:01:01:02 | 12:03:01:01 |
| PT12 | 07:01:01:01 |             | 01:01:01:01  |             | 02:02:01:01 | 02:01:01:01 | 02:01:02:01  | 01:03:01:01 | 23:01:01:01 | 44:03:01:01 | 03:03:01:01 |
|      | 07:01:01:01 |             |              |             | 02:02:01:01 | 02:01:01:01 | 04:01:01:01  | 01:03:01:02 | 26:01:01:01 | 55:01:01:01 | 04:01:01:01 |
| PT13 | 04:04:01:02 | 02:02:01:02 | 01:03:02:01  |             | 03:01:01:03 | 03:01:01:01 | 02:01:02:01  | 01:03:01:01 | 02:01:01:01 | 39:01:01:03 | 07:02:01:03 |
|      | 11:01:01:01 |             |              |             | 03:02:01:02 | 05:05:01:01 | 04:01:01:01  | 01:03:01:04 | 03:01:01:01 | 51:01:01:01 | 12:03:01:01 |
| PT14 | 01:01:01:01 |             |              |             | 04:02:01:04 | 01:01:01:01 | 03:01:01:01  | 01:03:01:02 | 01:01:01:01 | 15:01:01:06 | 01:02:01:01 |
|      | 08:01:01:01 |             |              |             | 05:01:01:03 | 04:01:01:01 | 04:01:01:01  | 01:03:01:03 | 02:01:01:01 | 52:01:01:02 | 12:02:02:01 |
| PT15 | 13:01:01:01 | 01:01:02:04 |              |             | 06:03:01:01 | 01:02:01:04 | 03:01:01:01  | 01:03:01:02 | 24:02:01:01 | 15:01:01:01 | 03:03:01:01 |
|      | 13:02:01:02 | 03:01:01:01 |              |             | 06:04:01:01 | 01:03:01:02 | 04:01:01:01  | 01:03:01:03 | 33:03:01:01 | 39:01:01:03 | 12:03:01:01 |
| PT16 | 03:01:01:01 | 01:01:02:01 |              | 01:01:01:01 | 02:01:01:01 | 01:02:01:10 | 04:02:01:02  | 01:03:01:05 | 01:01:01:01 | 08:01:01:01 | 04:01:01:01 |
|      | 15:01:01:01 |             |              |             | 06:02:01:01 | 05:01:01:02 | 14:01:01:01  | 02:01:01:02 | 03:01:01:01 | 35:01:01:02 | 07:01:01:01 |

### **Supplementary Table 5**

**GLYPH2 Clusters.** List of TCR $\beta$  specificity clusters obtained from GLYPH2 analysis and including PNS-myelin specific clonotypes based on global or local similarity.





|            |           |      |                   |                  |            |      |     |        |                |                                                 |                  |       |          |          |       |      |   |
|------------|-----------|------|-------------------|------------------|------------|------|-----|--------|----------------|-------------------------------------------------|------------------|-------|----------|----------|-------|------|---|
| CLUSTER_12 | GGSP_4_22 | 2340 | CATSRDPQGGSPPLHF  | TCRBV15-01       | TCRBJ01-06 | PT11 | 10  | AC GBS | CSF            | In vitro expanded CD4+ T cells                  | CATSRdpQGgSPLHF  | local | 3.60E-11 | 5.20E-36 | 0.001 | 0.97 | 1 |
| CLUSTER_12 | GGSP_4_22 | 141  | CASSYRGRGGSPPLHF  | TCRBV12-03/12-04 | TCRBJ01-06 | PT12 | 1   | AC GBS | CSF            | In vitro expanded CD4+ T cells                  | CASSYRGrGGSPPLHF | local | 3.60E-11 | 5.20E-36 | 0.001 | 0.97 | 1 |
| CLUSTER_12 | GGSP_4_22 | 80   | CASSGKGPGGGSPPLHF | TCRBV09-01       | TCRBJ01-06 | PT16 | 346 | AC GBS | Nerve biopsy   | In vitro expanded CD4+ T cells                  | CASSgkppGGgSPLHF | local | 3.60E-11 | 5.20E-36 | 0.001 | 0.97 | 1 |
| CLUSTER_12 | GGSP_4_22 | 82   | CARSgKGQGGGSPPLHF | TCRBV09-01       | TCRBJ01-06 | PT16 | 29  | AC GBS | Nerve biopsy   | In vitro expanded CD4+ T cells                  | CARsgKGQGGgSPLHF | local | 3.60E-11 | 5.20E-36 | 0.001 | 0.97 | 1 |
| CLUSTER_12 | GGSP_4_22 | 100  | CARSgTGPGGGSPPLHF | TCRBV09-01       | TCRBJ01-06 | PT16 | 19  | AC GBS | Nerve biopsy   | In vitro expanded CD4+ T cells                  | CARsGTGpGGgSPLHF | local | 3.60E-11 | 5.20E-36 | 0.001 | 0.97 | 1 |
| CLUSTER_12 | GGSP_4_22 | 85   | CARRGTGPGGGSPPLHF | TCRBV09-01       | TCRBJ01-06 | PT16 | 18  | AC GBS | Nerve biopsy   | In vitro expanded CD4+ T cells                  | CARrGTGpGGgSPLHF | local | 3.60E-11 | 5.20E-36 | 0.001 | 0.97 | 1 |
| CLUSTER_12 | GGSP_4_22 | 86   | CARRGKGQGGGSPPLHF | TCRBV09-01       | TCRBJ01-06 | PT16 | 9   | AC GBS | Nerve biopsy   | In vitro expanded CD4+ T cells                  | CARRgKGQGGgSPLHF | local | 3.60E-11 | 5.20E-36 | 0.001 | 0.97 | 1 |
| CLUSTER_12 | GGSP_4_22 | 106  | CASSGTGPGGGSPPLHF | TCRBV09-01       | TCRBJ01-06 | PT16 | 8   | AC GBS | Nerve biopsy   | In vitro expanded CD4+ T cells                  | CASSGTGpGGgSPLHF | local | 3.60E-11 | 5.20E-36 | 0.001 | 0.97 | 1 |
| CLUSTER_12 | GGSP_4_22 | 104  | CASRGKGPGGGSPPLHF | TCRBV09-01       | TCRBJ01-06 | PT16 | 6   | AC GBS | Nerve biopsy   | In vitro expanded CD4+ T cells                  | CASRGkppGGgSPLHF | local | 3.60E-11 | 5.20E-36 | 0.001 | 0.97 | 1 |
| CLUSTER_12 | GGSP_4_22 | 141  | CASRGTPGGGSPPLHF  | TCRBV09-01       | TCRBJ01-06 | PT16 | 6   | AC GBS | Nerve biopsy   | In vitro expanded CD4+ T cells                  | CASrGTGpGGgSPLHF | local | 3.60E-11 | 5.20E-36 | 0.001 | 0.97 | 1 |
| CLUSTER_12 | GGSP_4_22 | 123  | CASRGTKGGGSPPLHF  | TCRBV09-01       | TCRBJ01-06 | PT16 | 6   | AC GBS | Nerve biopsy   | In vitro expanded CD4+ T cells                  | CASrGTGkGGgSPLHF | local | 3.60E-11 | 5.20E-36 | 0.001 | 0.97 | 1 |
| CLUSTER_12 | GGSP_4_22 | 152  | CARRGKGPGGGSPPLHF | TCRBV09-01       | TCRBJ01-06 | PT16 | 3   | AC GBS | Nerve biopsy   | In vitro expanded CD4+ T cells                  | CARRGkppGGgSPLHF | local | 3.60E-11 | 5.20E-36 | 0.001 | 0.97 | 1 |
| CLUSTER_12 | GGSP_4_22 | 91   | CPSSGKGQGGGSPPLHF | TCRBV09-01       | TCRBJ01-06 | PT16 | 3   | AC GBS | Nerve biopsy   | In vitro expanded CD4+ T cells                  | CpssgKGQGGgSPLHF | local | 3.60E-11 | 5.20E-36 | 0.001 | 0.97 | 1 |
| CLUSTER_12 | GGSP_4_22 | 120  | CAPSGKGQGGGSPPLHF | TCRBV09-01       | TCRBJ01-06 | PT16 | 2   | AC GBS | Nerve biopsy   | In vitro expanded CD4+ T cells                  | CAPsgKGQGGgSPLHF | local | 3.60E-11 | 5.20E-36 | 0.001 | 0.97 | 1 |
| CLUSTER_12 | GGSP_4_22 | 48   | CASSGTGQGGGSPPLHF | TCRBV09-01       | TCRBJ01-06 | PT16 | 2   | AC GBS | Nerve biopsy   | In vitro expanded CD4+ T cells                  | CASSGTGqGGgSPLHF | local | 3.60E-11 | 5.20E-36 | 0.001 | 0.97 | 1 |
| CLUSTER_12 | GGSP_4_22 | 150  | CAPRGTGPGGGSPPLHF | TCRBV09-01       | TCRBJ01-06 | PT16 | 1   | AC GBS | Nerve biopsy   | In vitro expanded CD4+ T cells                  | CAPrGTGpGGgSPLHF | local | 3.60E-11 | 5.20E-36 | 0.001 | 0.97 | 1 |
| CLUSTER_12 | GGSP_4_22 | 149  | CAPSGKGPGGGSPPLHF | TCRBV09-01       | TCRBJ01-06 | PT16 | 1   | AC GBS | Nerve biopsy   | In vitro expanded CD4+ T cells                  | CAPSGkppGGgSPLHF | local | 3.60E-11 | 5.20E-36 | 0.001 | 0.97 | 1 |
| CLUSTER_12 | GGSP_4_22 | 148  | CAPSGTGPGGGSPPLHF | TCRBV09-01       | TCRBJ01-06 | PT16 | 1   | AC GBS | Nerve biopsy   | In vitro expanded CD4+ T cells                  | CAPsgTGPGGgSPLHF | local | 3.60E-11 | 5.20E-36 | 0.001 | 0.97 | 1 |
| CLUSTER_12 | GGSP_4_22 | 145  | CASCgKGQGGGSPPLHF | TCRBV09-01       | TCRBJ01-06 | PT16 | 1   | AC GBS | Nerve biopsy   | In vitro expanded CD4+ T cells                  | CAScgKGQGGgSPLHF | local | 3.60E-11 | 5.20E-36 | 0.001 | 0.97 | 1 |
| CLUSTER_12 | GGSP_4_22 | 143  | CASCgTGPGGGSPPLHF | TCRBV09-01       | TCRBJ01-06 | PT16 | 1   | AC GBS | Nerve biopsy   | In vitro expanded CD4+ T cells                  | CAScGTGpGGgSPLHF | local | 3.60E-11 | 5.20E-36 | 0.001 | 0.97 | 1 |
| CLUSTER_12 | GGSP_4_22 | 3736 | CAWSAGTGGSPPLHF   | TCRBV30-01       | TCRBJ01-06 | PT16 | 1   | AC GBS | Blood CFSE low | POP2/PMP22-specific central memory CD4+ T cells | CAWSAGTGGSPPLHF  | local | 3.60E-11 | 5.20E-36 | 0.001 | 0.97 | 1 |
| CLUSTER_12 | GGSP_4_22 | 103  | CPPRGTGPGGGSPPLHF | TCRBV09-01       | TCRBJ01-06 | PT16 | 1   | AC GBS | Nerve biopsy   | In vitro expanded CD4+ T cells                  | CpprGTGpGGgSPLHF | local | 3.60E-11 | 5.20E-36 | 0.001 | 0.97 | 1 |
| CLUSTER_12 | GGSP_4_22 | 99   | CPRRGKGQGGGSPPLHF | TCRBV09-01       | TCRBJ01-06 | PT16 | 1   | AC GBS | Nerve biopsy   | In vitro expanded CD4+ T cells                  | CprgkKGQGGgSPLHF | local | 3.60E-11 | 5.20E-36 | 0.001 | 0.97 | 1 |
| CLUSTER_12 | GGSP_4_22 | 89   | CPRRGTGPGGGSPPLHF | TCRBV09-01       | TCRBJ01-06 | PT16 | 1   | AC GBS | Nerve biopsy   | In vitro expanded CD4+ T cells                  | CPrmGTGpGGgSPLHF | local | 3.60E-11 | 5.20E-36 | 0.001 | 0.97 | 1 |
| CLUSTER_12 | GGSP_4_22 | 103  | CPsRGKGPGGGSPPLHF | TCRBV09-01       | TCRBJ01-06 | PT16 | 1   | AC GBS | Nerve biopsy   | In vitro expanded CD4+ T cells                  | CpsRGkppGGgSPLHF | local | 3.60E-11 | 5.20E-36 | 0.001 | 0.97 | 1 |
| CLUSTER_12 | GGSP_4_22 | 100  | CPsRGKGQGGGSPPLHF | TCRBV09-01       | TCRBJ01-06 | PT16 | 1   | AC GBS | Nerve biopsy   | In vitro expanded CD4+ T cells                  | CpsrgKGQGGgSPLHF | local | 3.60E-11 | 5.20E-36 | 0.001 | 0.97 | 1 |

\*Clonotype ID from Supplementary Table 1
