# Supplementary material for: Autoreactive T cells target peripheral nerves in Guillain–Barré syndrome
Source: PubMed Central journal article supplement (PMC10830418; doi:10.1038/s41586-023-06916-6), 2024-01-17
Supplement: 41586_2023_6916_MOESM2_ESM.pdf [file 41586_2023_6916_MOESM2_ESM.pdf]

## Reporting Summary

Nature Portfolio wishes to improve the reproducibility of the work that we publish. This form provides structure for consistency and transparency in reporting. For further information on Nature Portfolio policies, see our [Editorial Policies](#) and the [Editorial Policy Checklist](#).

### Statistics

For all statistical analyses, confirm that the following items are present in the figure legend, table legend, main text, or Methods section.

n/a | Confirmed

- The exact sample size ( $n$ ) for each experimental group/condition, given as a discrete number and unit of measurement
- A statement on whether measurements were taken from distinct samples or whether the same sample was measured repeatedly
- The statistical test(s) used AND whether they are one- or two-sided  
*Only common tests should be described solely by name; describe more complex techniques in the Methods section.*
- A description of all covariates tested
- A description of any assumptions or corrections, such as tests of normality and adjustment for multiple comparisons
- A full description of the statistical parameters including central tendency (e.g. means) or other basic estimates (e.g. regression coefficient) AND variation (e.g. standard deviation) or associated estimates of uncertainty (e.g. confidence intervals)
- For null hypothesis testing, the test statistic (e.g.  $F$ ,  $t$ ,  $r$ ) with confidence intervals, effect sizes, degrees of freedom and  $P$  value noted  
*Give  $P$  values as exact values whenever suitable.*
- For Bayesian analysis, information on the choice of priors and Markov chain Monte Carlo settings
- For hierarchical and complex designs, identification of the appropriate level for tests and full reporting of outcomes
- Estimates of effect sizes (e.g. Cohen's  $d$ , Pearson's  $r$ ), indicating how they were calculated

*Our web collection on [statistics for biologists](#) contains articles on many of the points above.*

### Software and code

Policy information about [availability of computer code](#)

**Data collection** BD FACS Diva (v9.0) was used for acquisition of samples. The Microbeta2 Windows Workstation software (v2.3.0.12) was used to acquire data of T cell proliferation by [3H]-thymidine incorporation on a Beta counter 2 (Perkin Elmer).

**Data analysis** IMGTools (v3.5.31) was used to analyze TCR V $\beta$  sequences obtained by Sanger method. ImmunoSEQ Analyzer V3.0 (<http://www.immunoseq.com>) was used for data processing of TCR V $\beta$  CDR3 sequencing performed by Adaptive Biotechnologies. The R package immunarch 0.9.0 (<https://github.com/immunomind/immunarch>) was used to study antigen-specific clonotypes in each donor's repertoire according to bioidentity overlap, defined as identical identified V gene, amino acid sequence of the CDR3 region and identified J gene. The HetzDra/turboGlyph 0.99.2 R package (<https://github.com/HetzDra/turboGlyph/>) was used to group lymphocyte interaction by paratope hotspots and predict TCR $\beta$  specificity clusters. Graphpad Prism (v9) was used to analyze data and create plots. Seurat (v 4.9.9.9059) was used for the analysis of scRNAseq experiments. NetMHCIIpan 4.0 server was used for peptide-HLA affinity prediction. Data Analysis Software Suite for LEGENDplex™ (Biolegend) was used for the quantification cytokine release by autoreactive T cell clones. FlowJo (v10.8.1) was used for flow cytometry data analysis. Gene set enrichment analysis (GSEA) was performed using the software package "escape" (version 1.10.0, <https://github.com/ncborcherding/escape>). The R version used for all the computational analysis is v 4.2.1..

For manuscripts utilizing custom algorithms or software that are central to the research but not yet described in published literature, software must be made available to editors and reviewers. We strongly encourage code deposition in a community repository (e.g. GitHub). See the Nature Portfolio [guidelines for submitting code & software](#) for further information.

## Data

Policy information about [availability of data](#)

All manuscripts must include a [data availability statement](#). This statement should provide the following information, where applicable:

- Accession codes, unique identifiers, or web links for publicly available datasets
- A description of any restrictions on data availability
- For clinical datasets or third party data, please ensure that the statement adheres to our [policy](#)

Publicly available datasets included in the study are available at the following web links: <https://doi.org/10.21417/JSL2021S> ; <https://doi.org/10.21417/AC2020EJI> and <https://doi.org/10.21417/B73HOP>, <https://vdjdb.cdr3.net/search>, <https://www.ncbi.nlm.nih.gov/geo/query/acc.cgi> (accession numbers GSE59114, GSE126030, GSE131935, GSE104024, GSE193442) and <https://ega-archive.org/> (accession numbers EGAS00001003215, EGAD00001005290). The data presented in this manuscript are tabulated in the main paper and in the supplementary materials. TCR V $\beta$  sequences from samples listed in Extended Data Table 2 are deposited in the immuneACCESS database (<https://www.immunoseq.com/immuneaccess/>, DOI: <https://doi.org/10.21417/LS2023N>).

## Human research participants

Policy information about [studies involving human research participants and Sex and Gender in Research](#).

Reporting on sex and gender

The study cohort was comprised of both sexes as shown in Extended Data Table 1. Patients were included in the study as samples become available and sexes were included whenever possible.

Population characteristics

Relevant information on human research participants such as age, gender, disease, HLA-typing and anti-gangliosides antibody presence are provided in Extended Data Table 1 and Supplementary Table 3. Specifically, the study included 20 GBS patients (age range 30-50, 59.5  $\pm$  13.3 (mean  $\pm$  SD)) and 5 CMT1 patients (age range 23-45, 32  $\pm$  8.4 (mean  $\pm$  SD)) recruited from University Hospital Zurich and Cantonal Hospital of Lugano (EOC), and 21 HD obtained from the Swiss Blood Donation Center of Lugano (n = 15, age range 23-51, 47.5  $\pm$  15.1 (mean  $\pm$  SD)) and from the CoV-ETH study (n = 6, age range 38-50, 41.3  $\pm$  4.6 (mean  $\pm$  SD)). We included a total of 16 patients with AIDP, both at acute phase (range 7 - 36 days from disease onset, 12.7  $\pm$  9.9 (mean  $\pm$  SD)), and/or at follow-up visits during the recovery stage (range 135-509 days from disease onset, 244.6  $\pm$  115.7 (mean  $\pm$  SD)) (Extended Data Table 1). We also included AMAN patients (n = 4, all associated with preceding gastroenteritis) at disease onset (n=3, range 4-8 days from disease onset 5.7  $\pm$  2.1 (mean  $\pm$  SD) or recovery (n=1, 1520 days after disease onset), or CMT1 patients (n= 3 CMT1A and n=2 CMT1X).

Recruitment

Recruitment of patients was biased by the study design. Given the large clinical heterogeneity of GBS disease, the study specifically aimed at characterizing autoreactive T cell responses initially in matched acute/recovery samples from a defined subset of GBS patients, specifically suffering from the AIDP subtype. The AIDP patients were included in the study based on the diagnosis when matched acute/recovery samples become available. AMAN and CMT patients were included later based on the diagnosis as they become available. Diagnosis of AIDP, AMAN or CMT was based on the criteria of the National Institute of Neurological Disorders and Stroke (NINDS). Biological samples were collected at acute phase and/or at follow-up visits during the recovery stage (Extended Data Table 1). All patient samples were recruited from University Hospital Zurich and Cantonal Hospital of Lugano (EOC). Healthy donors were recruited at the Swiss Blood Donation Center of Lugano and post-COVID-19 healthy donors were recruited from the CoV-ETH cohort study and used as control group in all experiments.

Ethics oversight

The study was approved by the Ethical committees of Zurich (NeuroMyoCyTOF study, BASEC-Nr: 2016-00929; CoV-ETH cohort, BASEC-Nr. 2020-00949) and Lugano (IGOS study, BASEC-Nr: 2018-01860). All participants provided written informed consent for participation in the study.

Note that full information on the approval of the study protocol must also be provided in the manuscript.

## Field-specific reporting

Please select the one below that is the best fit for your research. If you are not sure, read the appropriate sections before making your selection.

- Life sciences       Behavioural & social sciences       Ecological, evolutionary & environmental sciences

For a reference copy of the document with all sections, see [nature.com/documents/nr-reporting-summary-flat.pdf](https://www.nature.com/documents/nr-reporting-summary-flat.pdf)

## Life sciences study design

All studies must disclose on these points even when the disclosure is negative.

Sample size

AIDP (n=16), AMAN (n=4), CMT (n=5) patients and HD (n= 21). No statistical methods were used to predetermine sample size. GBS is a rare disease and we included in the study patients enrolled in different centers in Switzerland and based on the diagnosis of AIDP, AMAN or CMT subtype. Sample size was chosen based our previous studies (i.e. Narcolepsy study, Latorre et al, Nature, 2018) as well as on the clear evidence of significant enrichment of autoreactive T cells in GBS patients compared to healthy individuals.

Data exclusions

Data from bulk TCR sequencing of CD4+ memory T cells ex vivo from the blood of GBS patients were excluded from the calculation of the

|                 |                                                                                                                                                                                                                                                                                                                                                                                                                                                                                                                                                                                                                                                                                                                                                             |
|-----------------|-------------------------------------------------------------------------------------------------------------------------------------------------------------------------------------------------------------------------------------------------------------------------------------------------------------------------------------------------------------------------------------------------------------------------------------------------------------------------------------------------------------------------------------------------------------------------------------------------------------------------------------------------------------------------------------------------------------------------------------------------------------|
| Data exclusions | cumulative frequency (Fig 4d and h) if they had less than 5500 clonotypes (identified as productive rearrangements).<br>In scRNAseq data analysis, on the basis of QC exclusion was done by filtering of low-quality cells and cell doublets or multiples, and cells with >5% mitochondrial counts, we normalized the data and performed scaling, dimensionality reduction and clustering on the top 2000 highly variable features in the dataset (Seurat v 4.9.9.9059).                                                                                                                                                                                                                                                                                    |
| Replication     | In the cases of T cell clones, their reactivity against self-antigens was mostly assessed in multiple occasions (in at least 2 separate experiments) with reproducible results.                                                                                                                                                                                                                                                                                                                                                                                                                                                                                                                                                                             |
| Randomization   | Randomization was not possible given the experimental design. The AIDP patients were included in the study based on the diagnosis when matched acute/recovery samples become available. AMAN and CMT patients were included later based on the diagnosis. The requisite for inclusion in the study was based on the diagnosis of AIDP, AMAN and CMT according to the criteria of the National Institute of Neurological Disorders and Stroke (NINDS).                                                                                                                                                                                                                                                                                                       |
| Blinding        | Investigators were not blinded to allocation during experiments and outcome assessment due to the experimental design of the study and the low likelihood of bias in the particular experiments. Given the large clinical heterogeneity of GBS disease, the study specifically aimed at characterizing autoreactive T cell responses in matched acute/recovery samples from a defined subset of GBS patients, specifically suffering from the AIDP subtype. AMAN and CMT patients and post-COVID-19 healthy donors were included later in the study. The investigators were unaware of the initial infectious trigger of the disease in the case on AIDP and AMAN patients. Healthy donors were specifically included as control groups in all experiments. |

## Reporting for specific materials, systems and methods

We require information from authors about some types of materials, experimental systems and methods used in many studies. Here, indicate whether each material, system or method listed is relevant to your study. If you are not sure if a list item applies to your research, read the appropriate section before selecting a response.

### Materials & experimental systems

| n/a                                 | Involved in the study                                  |
|-------------------------------------|--------------------------------------------------------|
| <input type="checkbox"/>            | <input checked="" type="checkbox"/> Antibodies         |
| <input checked="" type="checkbox"/> | <input type="checkbox"/> Eukaryotic cell lines         |
| <input checked="" type="checkbox"/> | <input type="checkbox"/> Palaeontology and archaeology |
| <input checked="" type="checkbox"/> | <input type="checkbox"/> Animals and other organisms   |
| <input checked="" type="checkbox"/> | <input type="checkbox"/> Clinical data                 |
| <input checked="" type="checkbox"/> | <input type="checkbox"/> Dual use research of concern  |

### Methods

| n/a                                 | Involved in the study                              |
|-------------------------------------|----------------------------------------------------|
| <input checked="" type="checkbox"/> | <input type="checkbox"/> ChIP-seq                  |
| <input type="checkbox"/>            | <input checked="" type="checkbox"/> Flow cytometry |
| <input checked="" type="checkbox"/> | <input type="checkbox"/> MRI-based neuroimaging    |

## Antibodies

### Antibodies used

CD3 BV785 Cat:300472; Clone:UCHT1; Biolegend  
 CD8 APC-Fire 750; Cat:301066; Clone:RPA-T8; Biolegend  
 CD8 FITC Cat: A07756 ; Clone: B9.11; Beckman Coulter  
 CD4 PE/Dazzle 594; Cat:300548; Clone:RPA-T4; Biolegend  
 CD45RA BV650 Cat:304136; Clone:HI100; Biolegend  
 CCR7 BV421 Cat:353208; Clone:G043H7; Biolegend  
 CD25 PC5 Cat:IM2646; Clone:B1.49.9; Beckman Coulter  
 CD56 PC5 Cat:A07789; Clone:N901; Beckman Coulter  
 CD14 PC5 Cat:A70204; Beckman Coulter  
 CD19 FITC Cat:555412; Clone:HIB19; BD Biosciences  
 ICOS Pacific Blue Cat:313522; Clone:H4A3; Biolegend  
 CD25 PE Cat:555432; Clone:M-A251; BD Biosciences  
 Granzyme A APC Cat:507220; Clone CB9; Biolegend  
 Granzyme B PE Cat:396406; Clone QA18A28; Biolegend  
 Perforin APC/Cyanine7 Cat:308128; Clone dG9; Biolegend  
 TNF $\alpha$  BV785 Cat:502948; Clone MAb11; Biolegend  
 IL-10 PE/Cyanine7 Cat:501404; Clone JES3-9D7; Biolegend  
 IL-17A BV605 Cat:512326; Clone BL168; Biolegend  
 IFN $\gamma$  BUV395 Cat:563563; Clone B27; BD Biosciences  
 IL-4 BV711 Cat:564112; Clone MP4-25D2; BD Biosciences  
 IL-22 BUV737 Cat:367-7229-42; Clone 22URT1; Thermo Fisher Scientific

antiHLA-DR, clone L243, ATCC cat n HB55, produced in house from hybridoma cell line  
 anti-HLA-DQ clone SPVL3 (1), produced in house from hybridoma cell line  
 anti-HLA-DP, clone B7/21 (2), produced in house from hybridoma cell line

(1) H. Spits, G. Keizer, J. Borst, C. Terhorst, A. Hekman, J. E. de Vries, Characterization of monoclonal antibodies against cell surface molecules associated with cytotoxic activity of natural and activated killer cells and cloned CTL lines. *Hybridoma* 2, 423–437 (1983). doi:10.1089/hyb.1983.2.423 Medline

(2) A. J. Watson, R. DeMars, I. S. Trowbridge, F. H. Bach, Detection of a novel human class II HLA antigen. *Nature* 304, 358–361 (1983). doi:10.1038/304358a0 Medline

## Validation

Commercial antibodies were used following the manufacturer's instructions. Anti-HLA neutralizing antibodies were validated by detecting expected blocking of proliferation on T cell clones with known HLA restriction.

CD3 BV785 Cat:300472; Clone:UCHT1; Biolegend: <https://www.biolegend.com/fr-ch/products/brilliant-violet-785-anti-human-cd3-antibody-14454>  
 CD8 APC-Fire 750; Cat:301066; Clone:RPA-T8; Biolegend: <https://www.biolegend.com/fr-ch/products/apc-fire-750-anti-human-cd8a-antibody-13580>  
 CD8 FITC Cat: A07756 ; Clone: B9.11; Beckman Coulter: <https://www.beckman.de/reagents/coulter-flow-cytometry/antibodies-and-kits/single-color-antibodies/cd8/A07756>  
 CD4 PE/Dazzle 594; Cat:300548; Clone:RPA-T4; Biolegend: <https://www.biolegend.com/fr-ch/products/pe-dazzle-594-anti-human-cd4-antibody-9780>  
 CD45RA BV650 Cat:304136; Clone:HI100; Biolegend: <https://www.biolegend.com/fr-ch/products/brilliant-violet-650-anti-human-cd45ra-antibody-7662>  
 CCR7 BV421 Cat:353208; Clone:G043H7; Biolegend: <https://www.biolegend.com/fr-ch/products/brilliant-violet-421-anti-human-cd197-ccr7-antibody-7497>  
 CD25 PC5 Cat:IM2646; Clone:B1.49.9; Beckman Coulter: <https://www.beckman.de/reagents/coulter-flow-cytometry/antibodies-and-kits/single-color-antibodies/cd25/IM2646>  
 CD56 PC5 Cat:A07789; Clone:N901; Beckman Coulter: <https://www.beckman.es/reagents/coulter-flow-cytometry/antibodies-and-kits/single-color-antibodies/cd56/A07789>  
 CD14 PC5 Cat:A70204; Beckman Coulter: <https://www.beckman.com/reagents/coulter-flow-cytometry/antibodies-and-kits/single-color-antibodies/cd14/a70204>  
 CD19 FITC Cat:555412; Clone:HIB19; BD Biosciences: <https://www.bdbiosciences.com/en-ch/products/reagents/flow-cytometry-reagents/research-reagents/single-color-antibodies-ruo/fic-mouse-anti-human-cd19.555412>  
 ICOS Pacific Blue Cat:313522; Clone:H4A3; Biolegend: <https://www.biolegend.com/fr-ch/products/pacific-blue-anti-human-mouse-rat-cd278-icos-antibody-7373>  
 CD25 PE Cat:555432; Clone:M-A251; BD Biosciences: <https://www.bdbiosciences.com/en-ch/products/reagents/flow-cytometry-reagents/research-reagents/single-color-antibodies-ruo/pe-mouse-anti-human-cd25.555432>  
 Granzyme A APC Cat:507220; Clone CB9; Biolegend: <https://www.biolegend.com/fr-ch/products/apc-anti-human-granzyme-a-antibody-15038>  
 Granzyme B PE Cat:396406; Clone QA18A28; Biolegend: <https://www.biolegend.com/fr-ch/products/pe-anti-human-mouse-granzyme-b-recombinant-antibody-17396>  
 Perforin APC/Cyanine7 Cat:308128; Clone dG9; Biolegend: <https://www.biolegend.com/fr-ch/products/apc-cyanine7-anti-human-perforin-antibody-13027>  
 TNF $\alpha$  BV785 Cat:502948; Clone MAb11; Biolegend: <https://www.biolegend.com/fr-ch/products/brilliant-violet-785-anti-human-tnf-alpha-antibody-12027>  
 IL-10 PE/Cyanine7 Cat:501404; Clone JES3-9D7; Biolegend: <https://www.biolegend.com/fr-ch/products/pe-anti-human-il-10-antibody-1341>  
 IL-17A BV605 Cat:512326; Clone BL168; Biolegend: <https://www.biolegend.com/fr-ch/products/brilliant-violet-605-anti-human-il-17a-antibody-7879>  
 IFN $\gamma$  BUV395 Cat:563563; Clone B27; BD Biosciences: <https://www.bdbiosciences.com/en-ch/products/reagents/flow-cytometry-reagents/research-reagents/single-color-antibodies-ruo/buv395-mouse-anti-human-ifn.563563>  
 IL-4 BV711 Cat:564112; Clone MP4-25D2; BD Biosciences: <https://www.bdbiosciences.com/en-ch/products/reagents/flow-cytometry-reagents/research-reagents/single-color-antibodies-ruo/bv711-rat-anti-human-il-4.564112>  
 IL-22 BUV737 Cat:367-7229-42; Clone 22URTI; Thermo Fisher Scientific: <https://www.thermofisher.com/antibody/product/IL-22-Antibody-clone-22URTI-Monoclonal/367-7229-42>

## Flow Cytometry

### Plots

Confirm that:

- The axis labels state the marker and fluorochrome used (e.g. CD4-FITC).
- The axis scales are clearly visible. Include numbers along axes only for bottom left plot of group (a 'group' is an analysis of identical markers).
- All plots are contour plots with outliers or pseudocolor plots.
- A numerical value for number of cells or percentage (with statistics) is provided.

### Methodology

#### Sample preparation

PBMCs were isolated with Ficoll-Paque Plus (GE Healthcare). Monocytes were enriched by positive selection using CD14-coated microbeads (Miltenyi Biotec). From the CD14<sup>-</sup> cell fraction, memory CD4<sup>+</sup> and CD8<sup>+</sup> total cells were sorted to over 98% purity on a FACSAria Fusion (BD) excluding CCR7<sup>+</sup>CD45RA<sup>+</sup>, CD25<sup>bright</sup>, CD14<sup>+</sup>, CD56<sup>+</sup> cells as well as either CD8<sup>+</sup> cells (for memory CD4<sup>+</sup> T cell enrichment) or CD4<sup>+</sup> cells (for memory CD8<sup>+</sup> T cell enrichment) according to the gating strategy shown in Extended Data Figure 1a. For intracellular cytokine staining, clones were restimulated with Phorbol-12-myristat-13-acetat (PMA) and Ionomycin in the presence of brefeldin A (all from Sigma-Aldrich), fixed and permeabilized with Cytofix/Cytoperm (BD Biosciences) according to the manufacturer's instructions.

#### Instrument

BD FACSAria Fusion  
BD LSRFortessa

|                           |                                                                                                                                                                                                                                                                                                                                                                                                                                                                                                                                        |
|---------------------------|----------------------------------------------------------------------------------------------------------------------------------------------------------------------------------------------------------------------------------------------------------------------------------------------------------------------------------------------------------------------------------------------------------------------------------------------------------------------------------------------------------------------------------------|
| Software                  | BD FACS Diva (v9.0) was used for acquisition of samples and Flow-Jo (v10.8.1) for analysis.                                                                                                                                                                                                                                                                                                                                                                                                                                            |
| Cell population abundance | Purity of the relevant cell populations (CD4+ and CD8+ memory T cells) was checked after sorting at BD LSRFortessa instrument and found to be >98%.                                                                                                                                                                                                                                                                                                                                                                                    |
| Gating strategy           | CD4+ and CD8+ total memory cells were sorted from CD14- fractions with BD FACSAria Fusion instrument excluding excluding CCR7+CD45RA+ double positive, CD25bright, CD14+ and CD56+ cells as well as either CD8+ cells (for memory CD4+ T cell enrichment) or CD4+ cells (for memory CD8+ T cell enrichment) according to the gating strategy shown in Extended Data Figure 1a. CD4+ T cells from CSF and nerve biopsy were sorted from T cell lines expanded in vitro using a BD FACSAria Fusion instrument as CD3+CD4+CD8-CD19-CD56-. |

Tick this box to confirm that a figure exemplifying the gating strategy is provided in the Supplementary Information.
